# Supplementary material for: Synthesis and characterization of 2-t-butylimino-functionalized indolyl rare-earth metal amido complexes for the catalytic addition of terminal alkynes to carbodiimides: the dimeric complexes with the alkynide species in the μ–η1:η2 bonding modes
Source: Royal Society of Chemistry journal article supplement (doi:10.1039/c9dt01582e), 2019-01-01
Supplement: c9dt01582e1.pdf [file c9dt01582e1.pdf]

**Electronic Supplementary Information for:**

**Synthesis and characterization of 2-*t*-butylimino-functionalized indolyl rare-earth metal amido complexes for the catalytic addition of terminal alkynes to carbodiimides: the dimeric complexes with the alkynide species in the  $\mu$ - $\eta^1$ : $\eta^2$  bonding modes**

Zhijun Feng,<sup>a,c</sup> Zeming Huang,<sup>a</sup> Shaowu Wang,<sup>\*a,b,d</sup> Yun Wei,<sup>a</sup> Shuangliu Zhou<sup>a</sup> and Xiancui Zhu<sup>a</sup>

<sup>a</sup> Key Laboratory of Functional Molecular Solids, Ministry of Education, Anhui Laboratory of Molecule-Based Materials, College of Chemistry and Materials Science, Anhui Normal University, Wuhu, Anhui 241002, P. R. China.

<sup>b</sup> College of Biological and Chemical Engineering, Anhui Polytechnic University, Wuhu, Anhui 241000, P. R. China.

<sup>c</sup> School of Pharmacy, Wannan Medical College, Wuhu, Anhui 241002, P. R. China.

<sup>d</sup> State Key Laboratory of Organometallic Chemistry, Shanghai Institute of Organic Chemistry, Shanghai 200032, P. R. China.

E-mail : [swwang@mail.ahnu.edu.cn](mailto:swwang@mail.ahnu.edu.cn); [wsw@ahpu.edu.cn](mailto:wsw@ahpu.edu.cn) .

**Contents**

|                                                                                                                              |            |
|------------------------------------------------------------------------------------------------------------------------------|------------|
| <b>1. Figure S1–S8: NMR spectra of complexes 3, 5, 6 and 11.....</b>                                                         | <b>S2</b>  |
| <b>2. Figure S9–S34: NMR spectra of substituted propiolamidines.....</b>                                                     | <b>S6</b>  |
| <b>3. Figure S35–S42: Molecular structures and selected bond distances and angles of the complexes 2–6, 10, 11, 12 .....</b> | <b>S19</b> |
| <b>4. Table S1–S3: Crystallographic data for 2–6, 10, 11, 12.....</b>                                                        | <b>S24</b> |

**NMR spectra of complexes 3, 5, 6 and 11.**

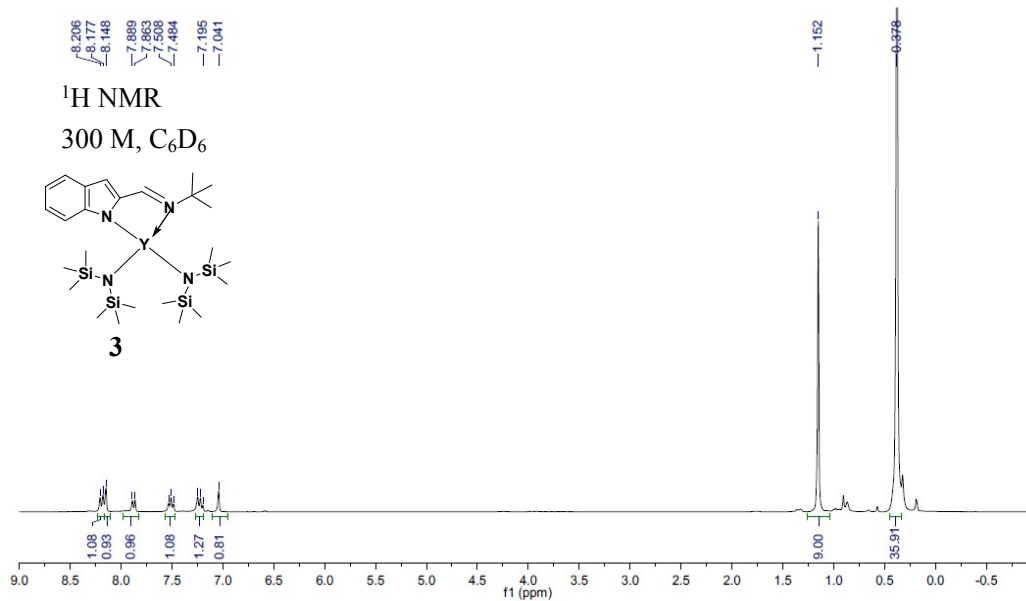

Figure S1. <sup>1</sup>H NMR spectrum of complex **3**.

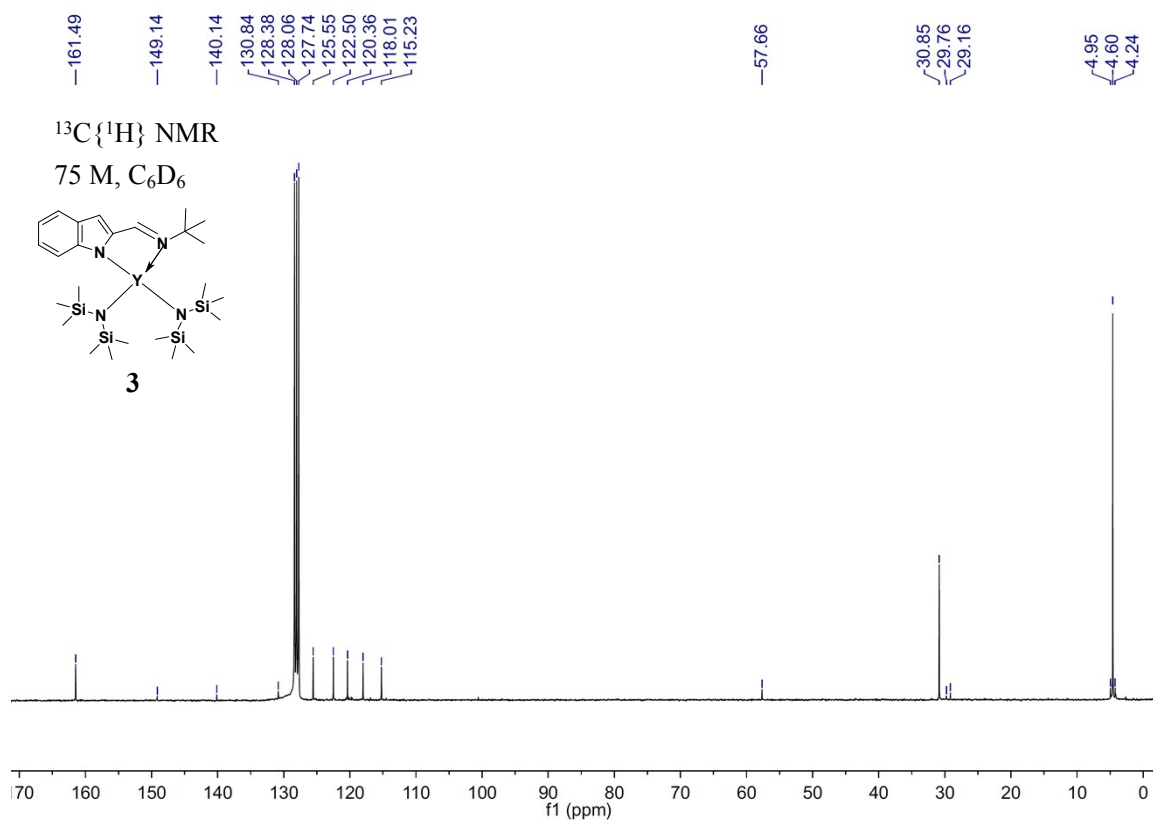

Figure S2. <sup>13</sup>C{<sup>1</sup>H} NMR spectrum of complex **3**.

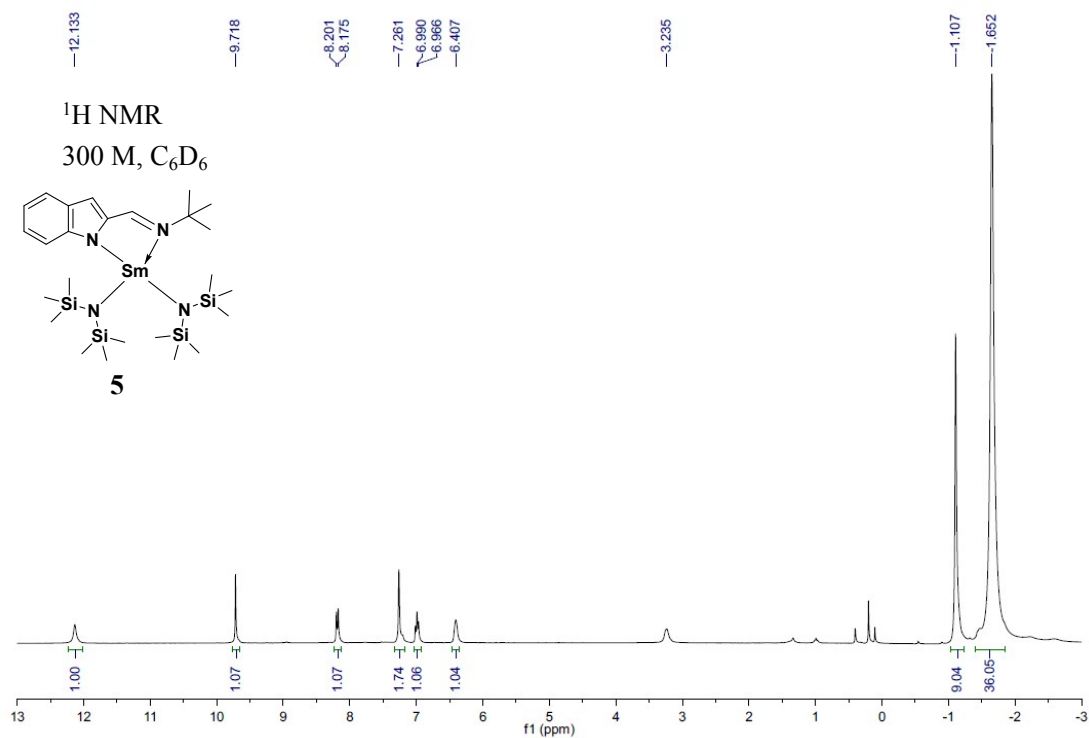

Figure S3. <sup>1</sup>H NMR spectrum of complex **5**.

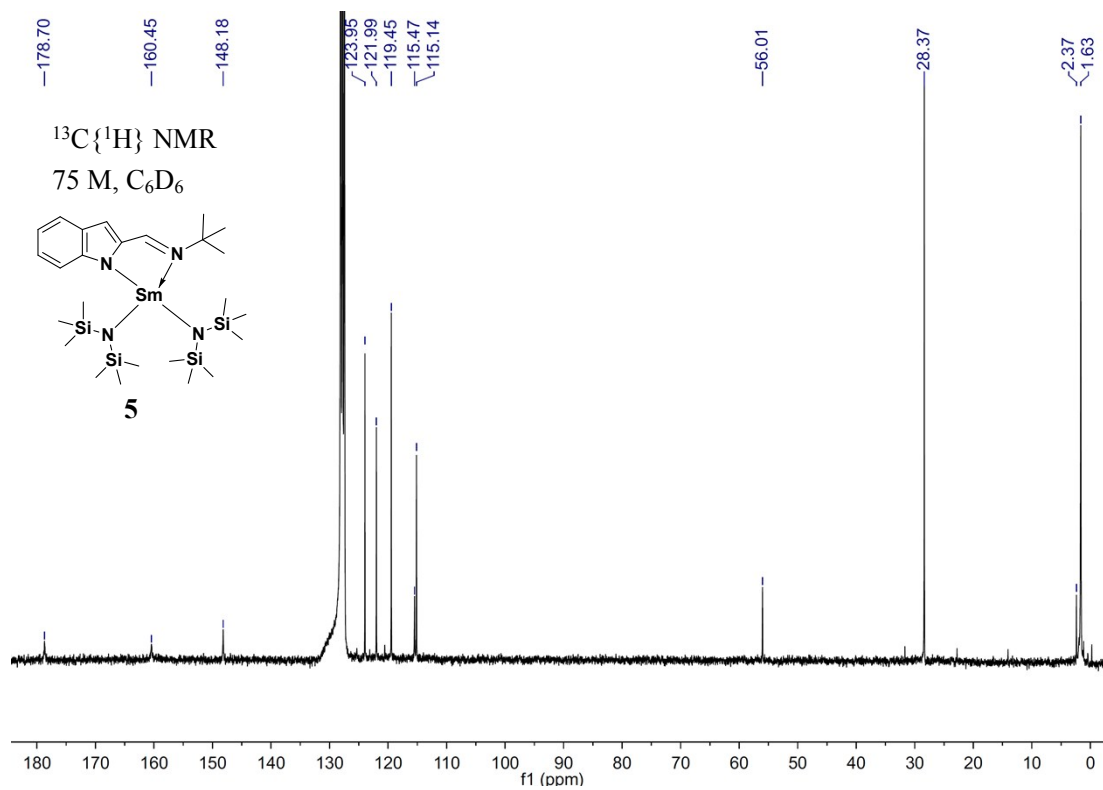

Figure S4. <sup>13</sup>C{<sup>1</sup>H} NMR spectrum of complex **5**.

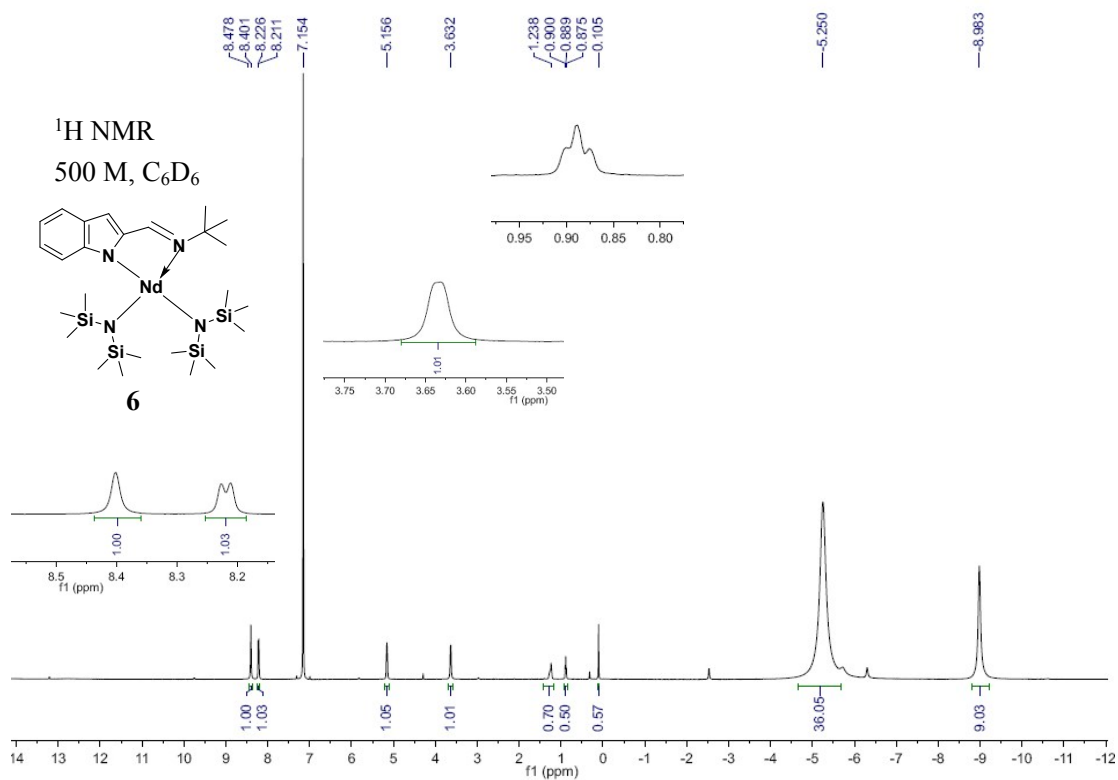

Figure S5. <sup>1</sup>H NMR spectrum of complex **6**.

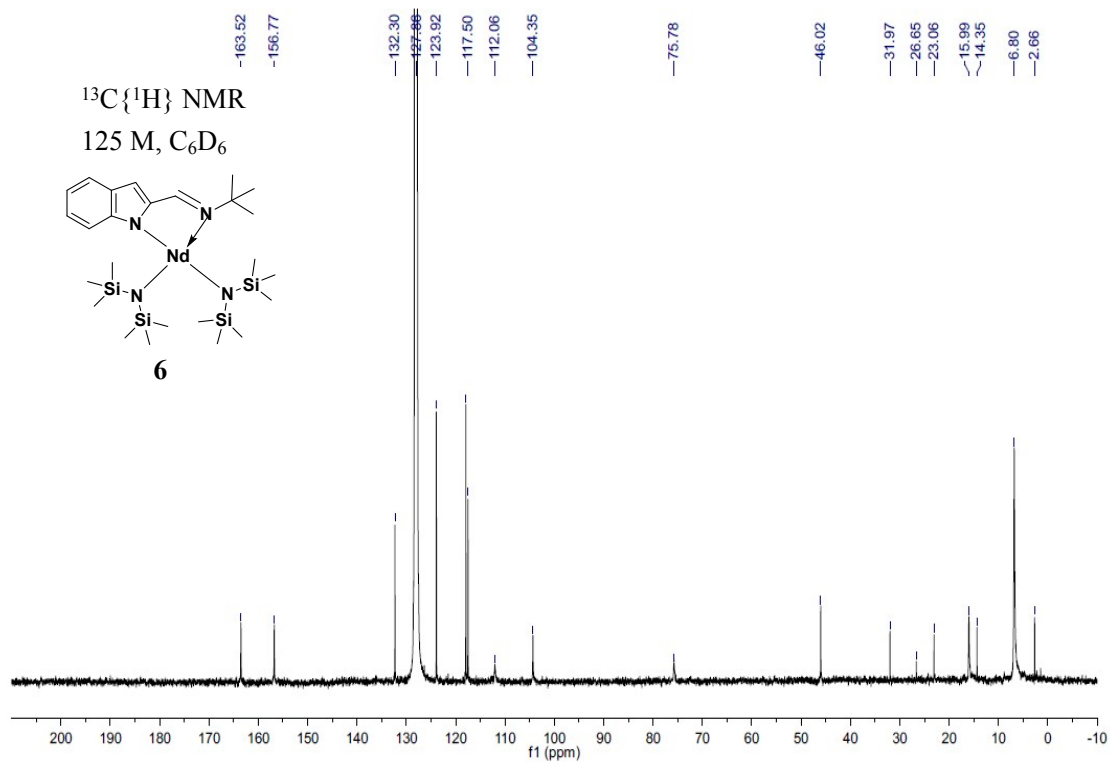

Figure S6. <sup>13</sup>C{<sup>1</sup>H} NMR spectrum of complex **6**.

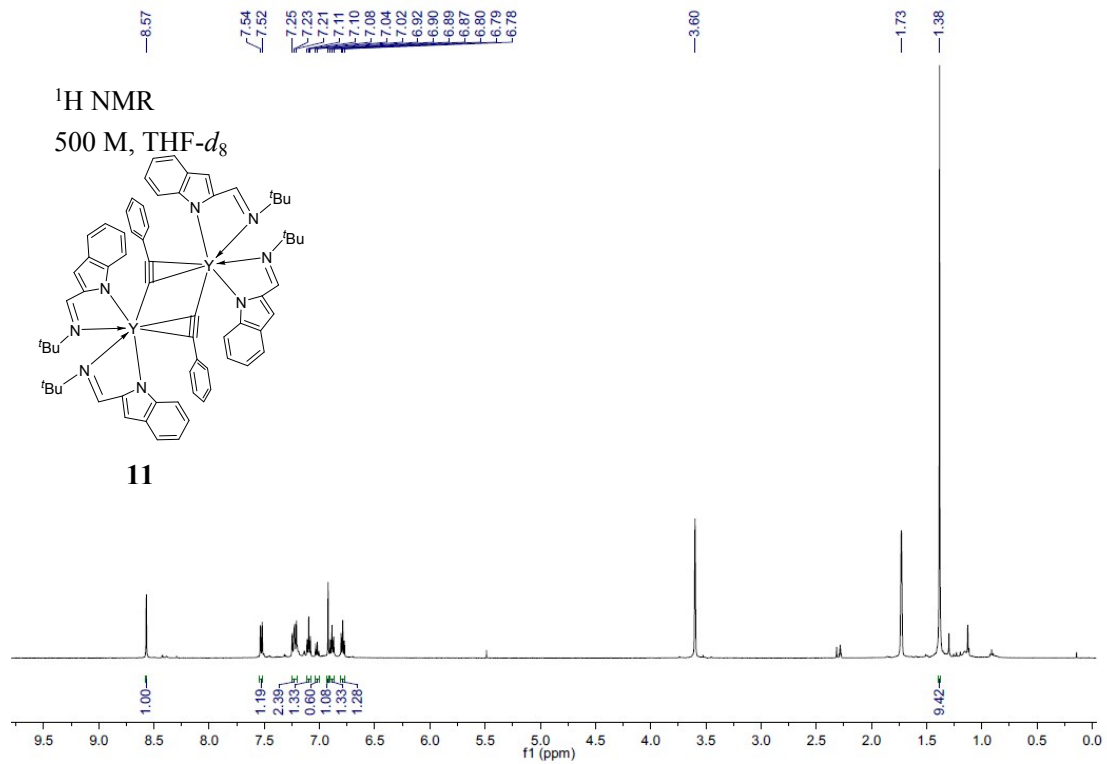

Figure S7. <sup>1</sup>H NMR spectrum of complex **11**.

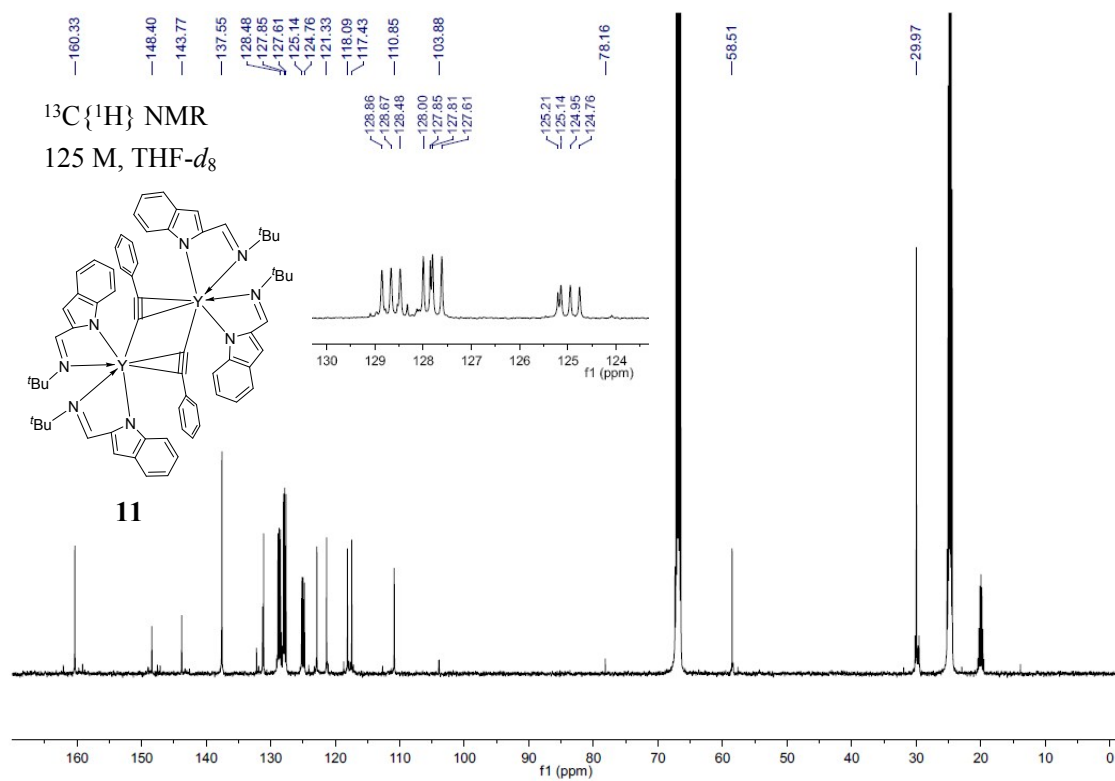

Figure S8. <sup>13</sup>C{<sup>1</sup>H} NMR spectrum of complex **11**.

## NMR spectra of substituted propiolamidines.

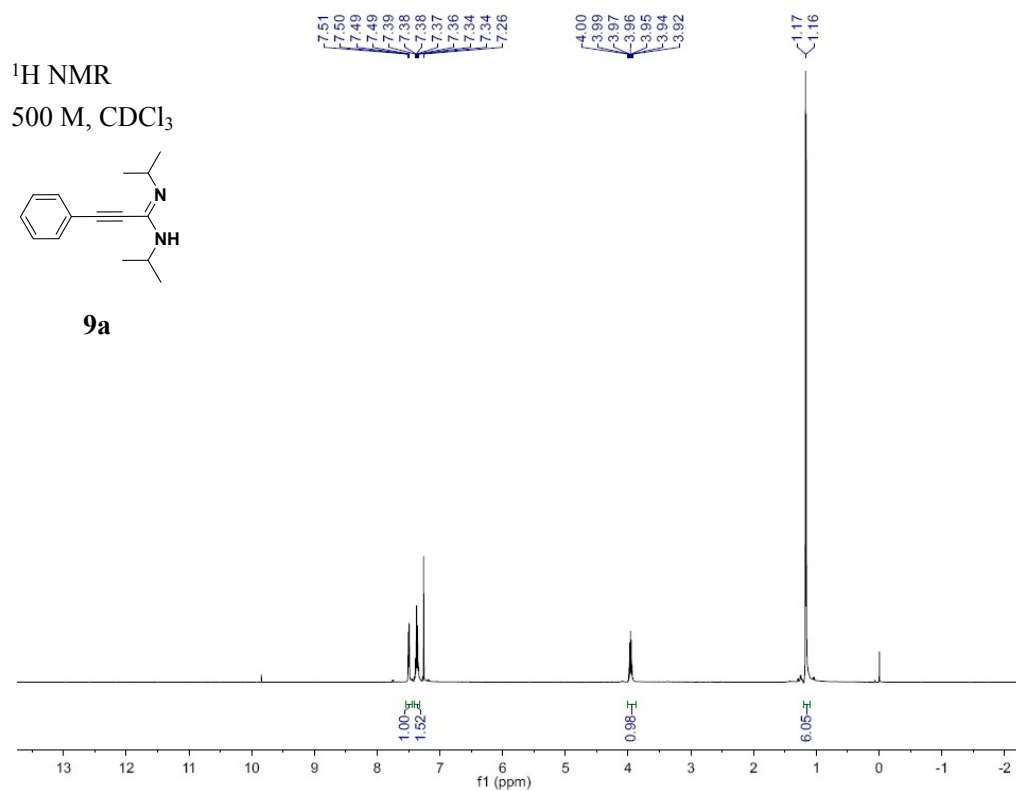

Figure S9.  $^1\text{H}$  NMR spectrum of compound **9a**.

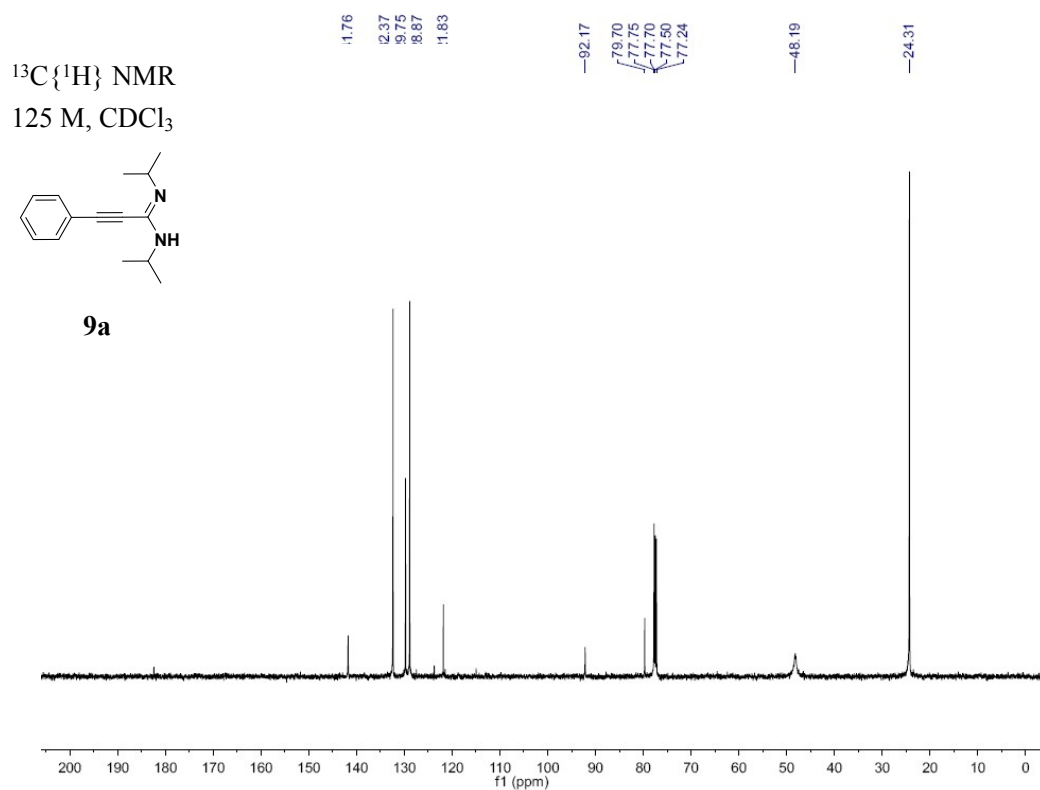

Figure S10.  $^{13}\text{C}\{^1\text{H}\}$  NMR spectrum of compound **9a**.

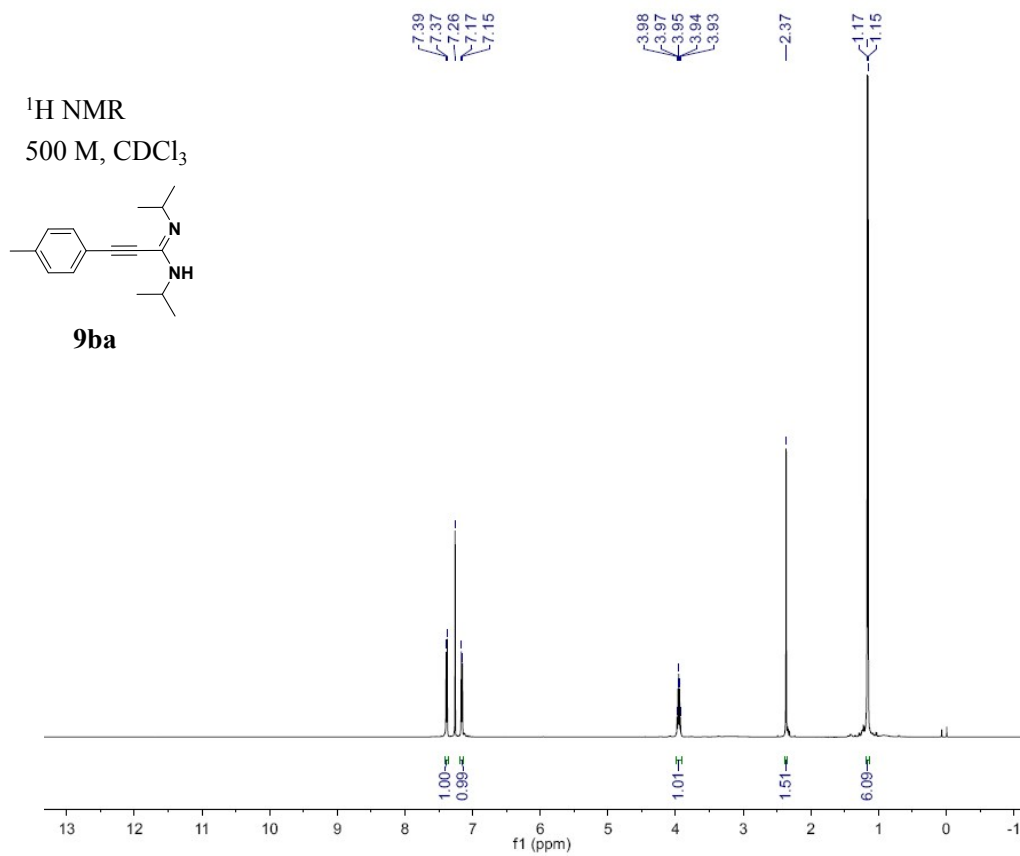

Figure S11. <sup>1</sup>H NMR spectrum of compound **9ba**.

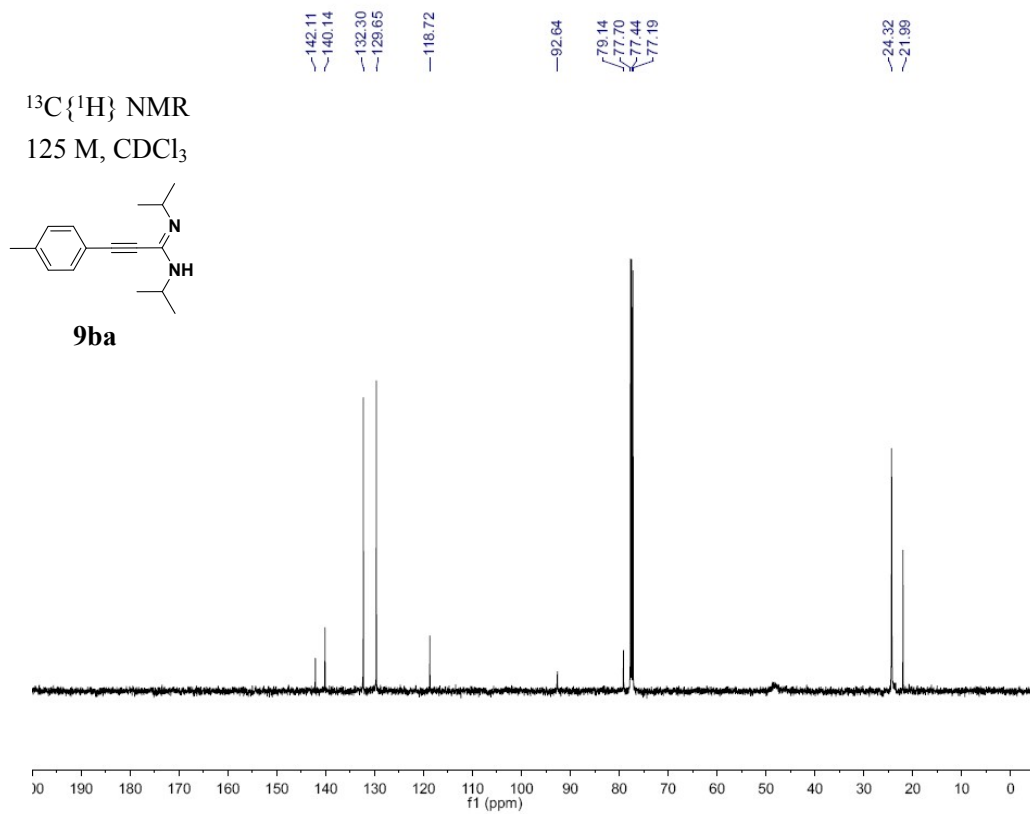

Figure S12. <sup>13</sup>C{<sup>1</sup>H} NMR spectrum of compound **9ba**.

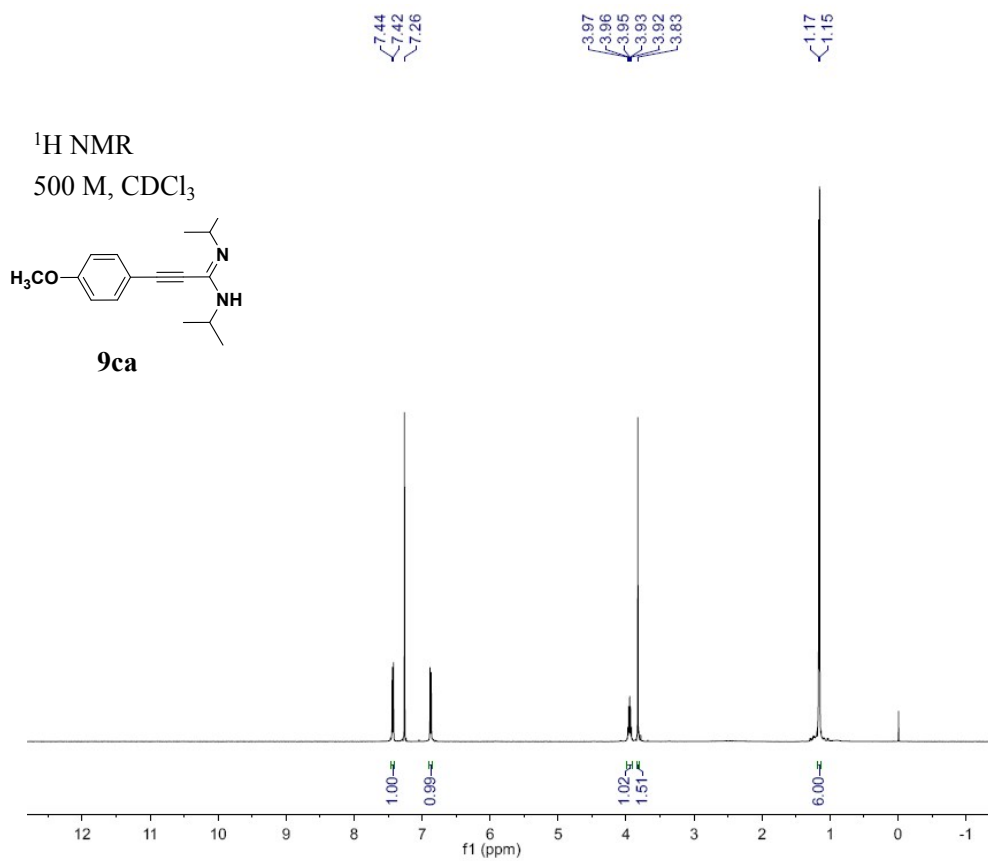

Figure S13. <sup>1</sup>H NMR spectrum of compound **9ca**.

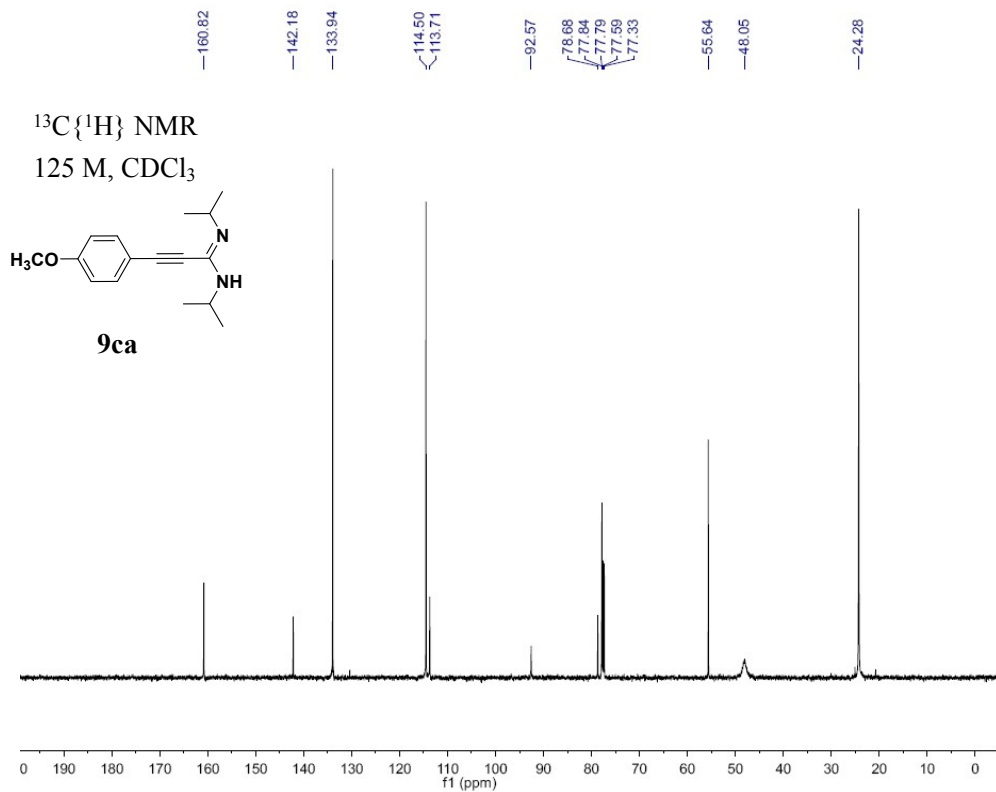

Figure S14. <sup>13</sup>C{<sup>1</sup>H} NMR spectrum of compound **9ca**.



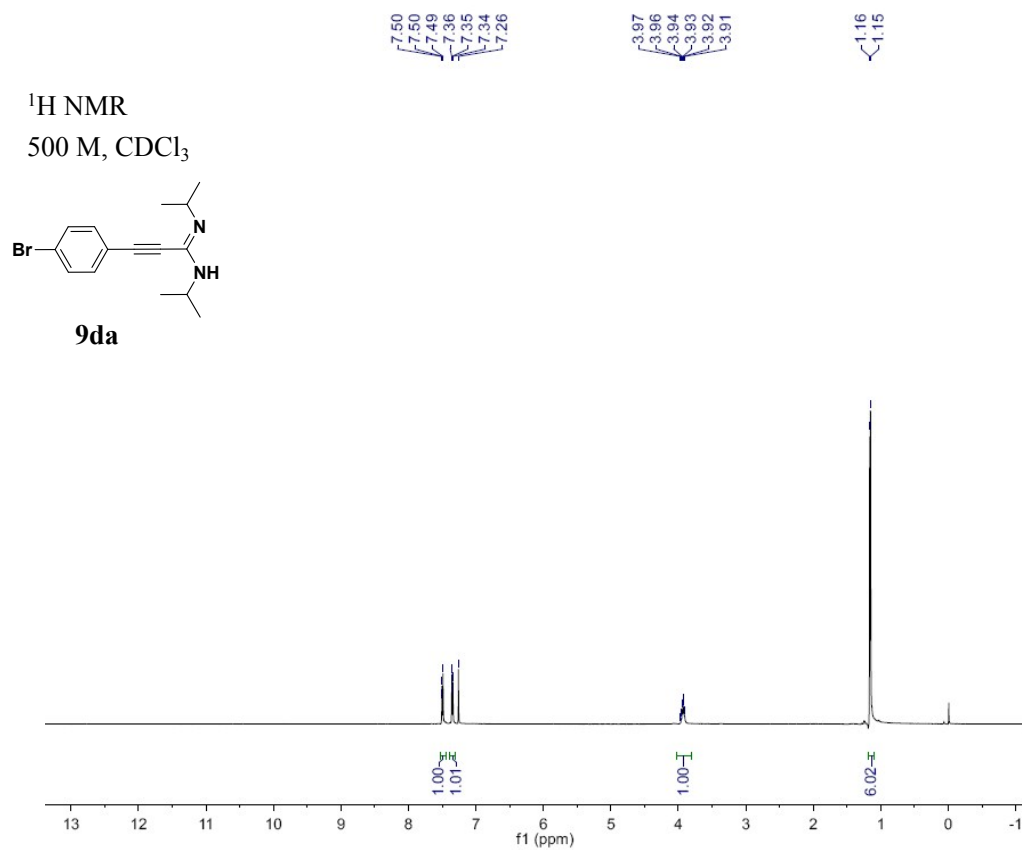

Figure S15. <sup>1</sup>H NMR spectrum of compound **9da**.

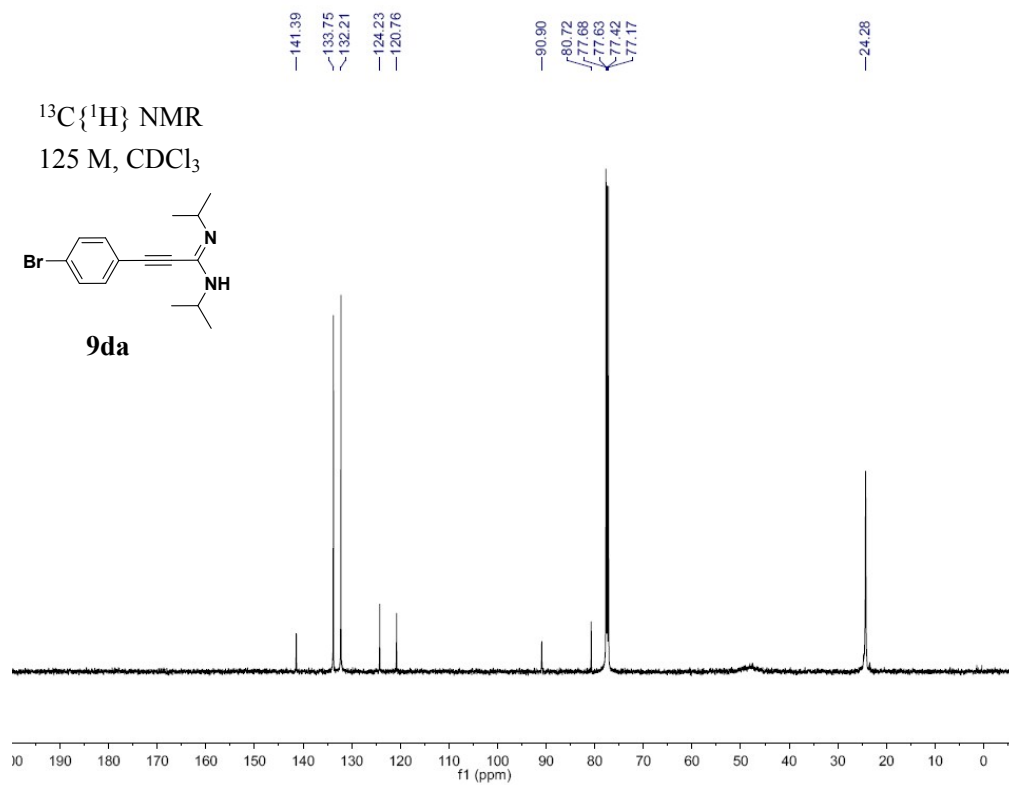

Figure

S16. <sup>13</sup>C{<sup>1</sup>H} NMR spectrum of compound **9da**.

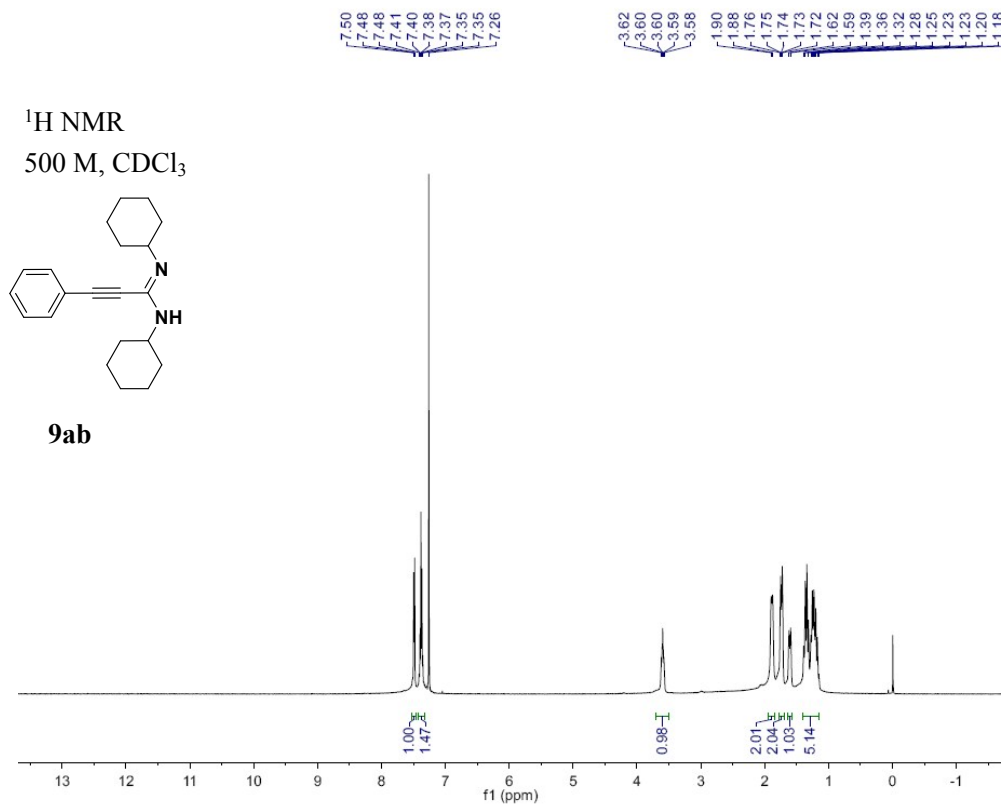

Figure S17. <sup>1</sup>H NMR spectrum of compound **9ab**.

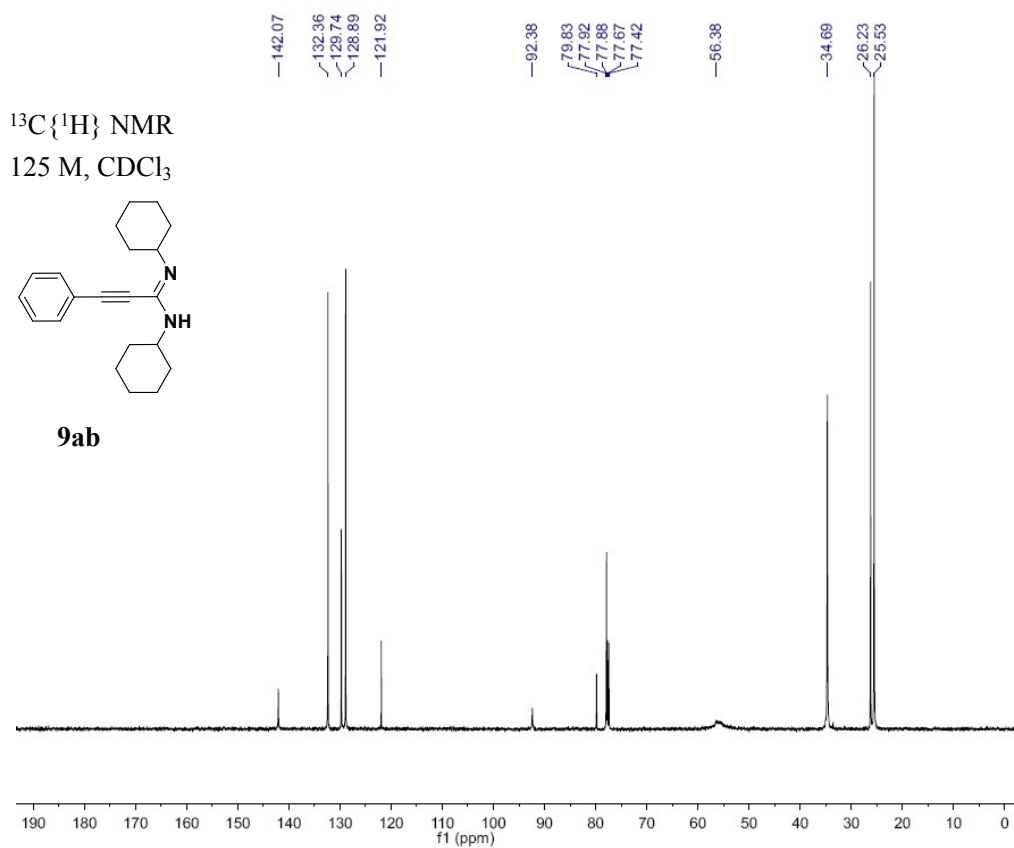

Figure S18. <sup>13</sup>C{<sup>1</sup>H} NMR spectrum of compound **9ab**.

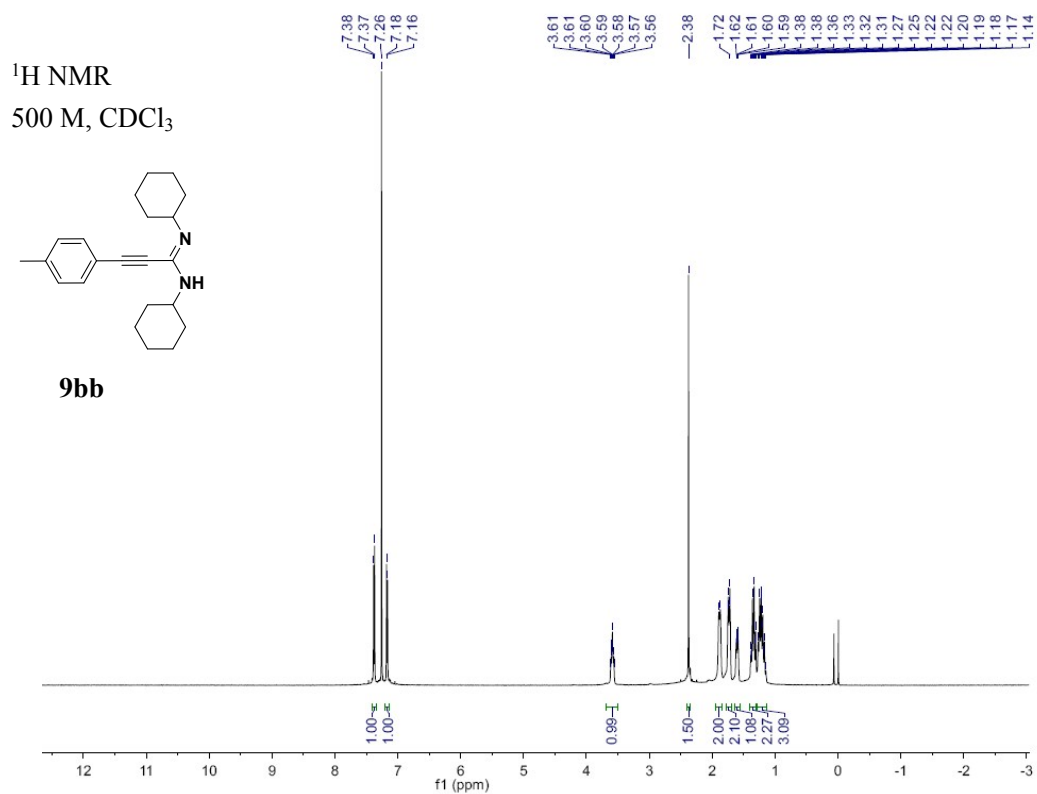

Figure S19. <sup>1</sup>H NMR spectrum of compound **9bb**.

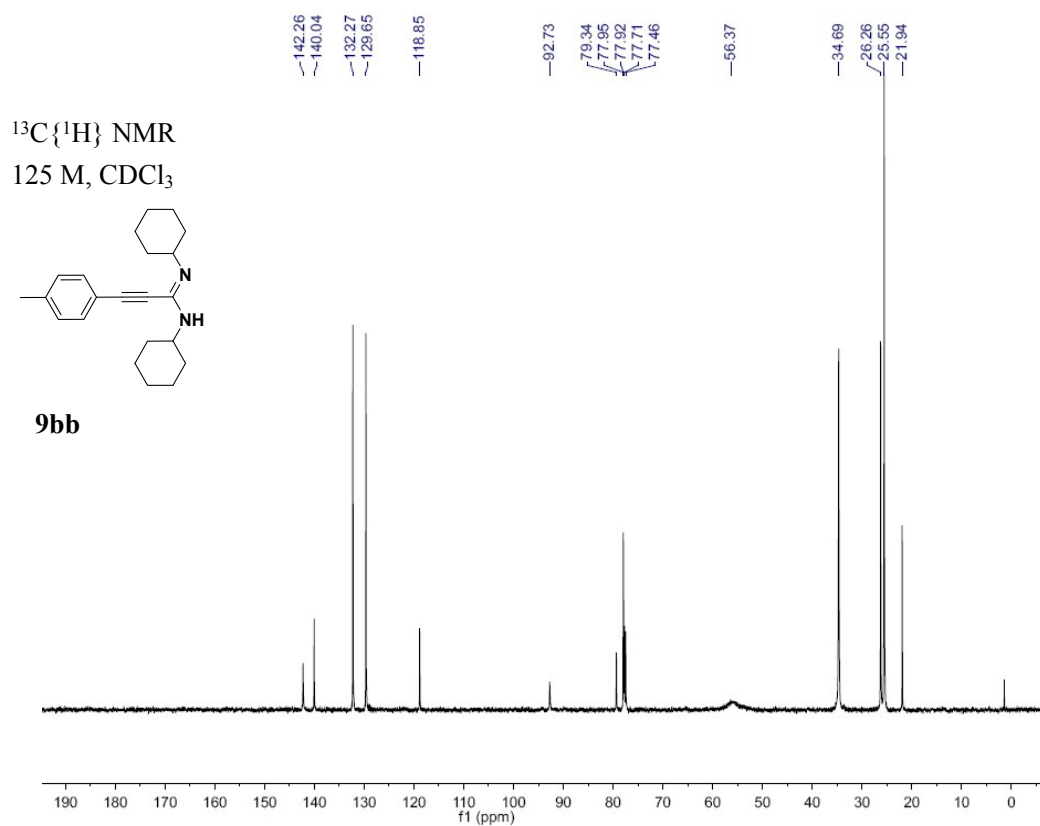

Figure S20. <sup>13</sup>C{<sup>1</sup>H} NMR spectrum of compound **9bb**.

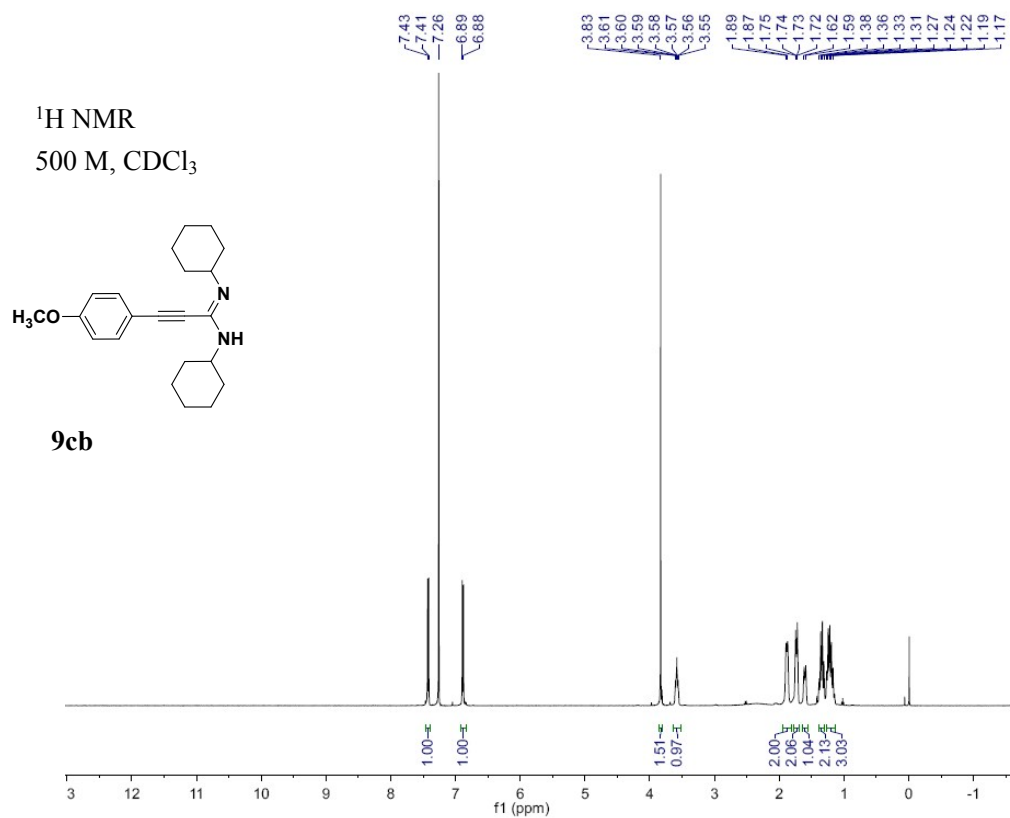

Figure S21. <sup>1</sup>H NMR spectrum of compound **9cb**.

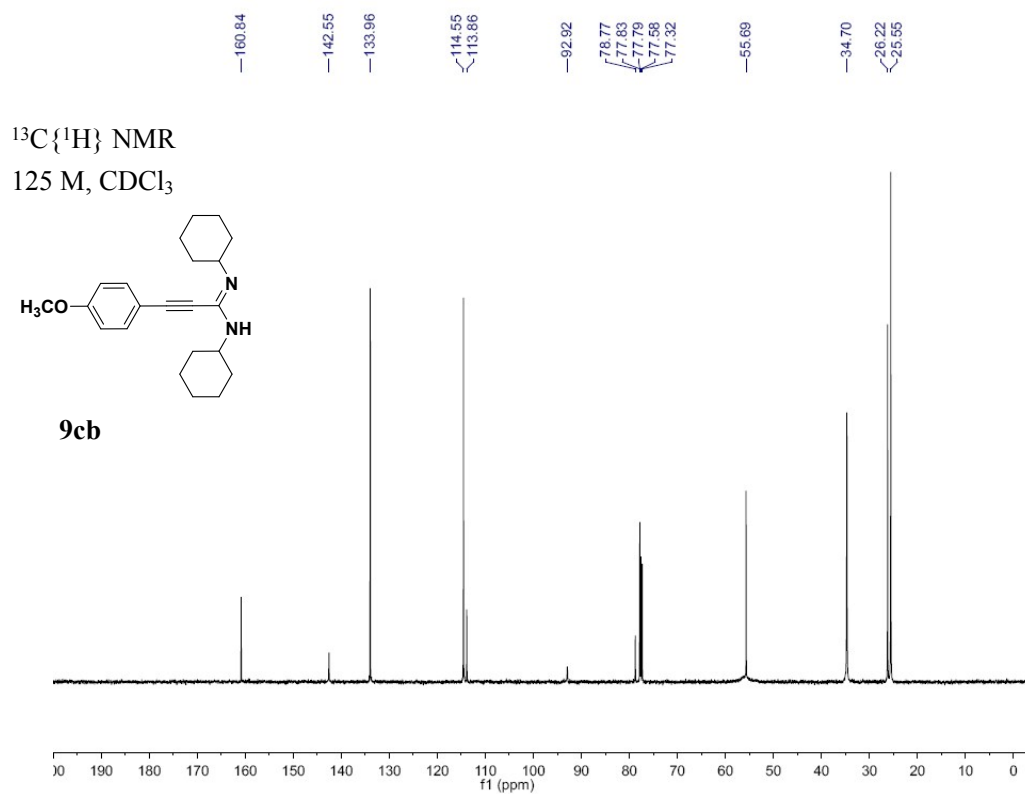

Figure S22. <sup>13</sup>C{<sup>1</sup>H} NMR spectrum of compound **9cb**.

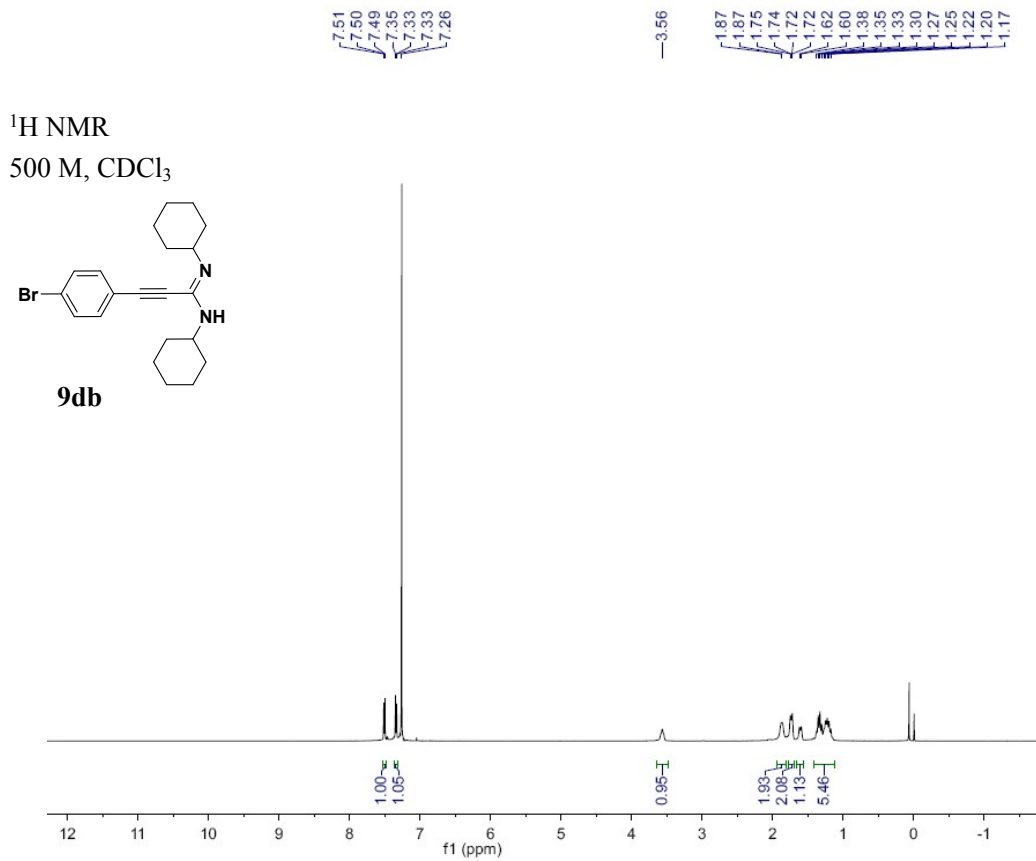

Figure S23. <sup>1</sup>H NMR spectrum of compound **9db**.

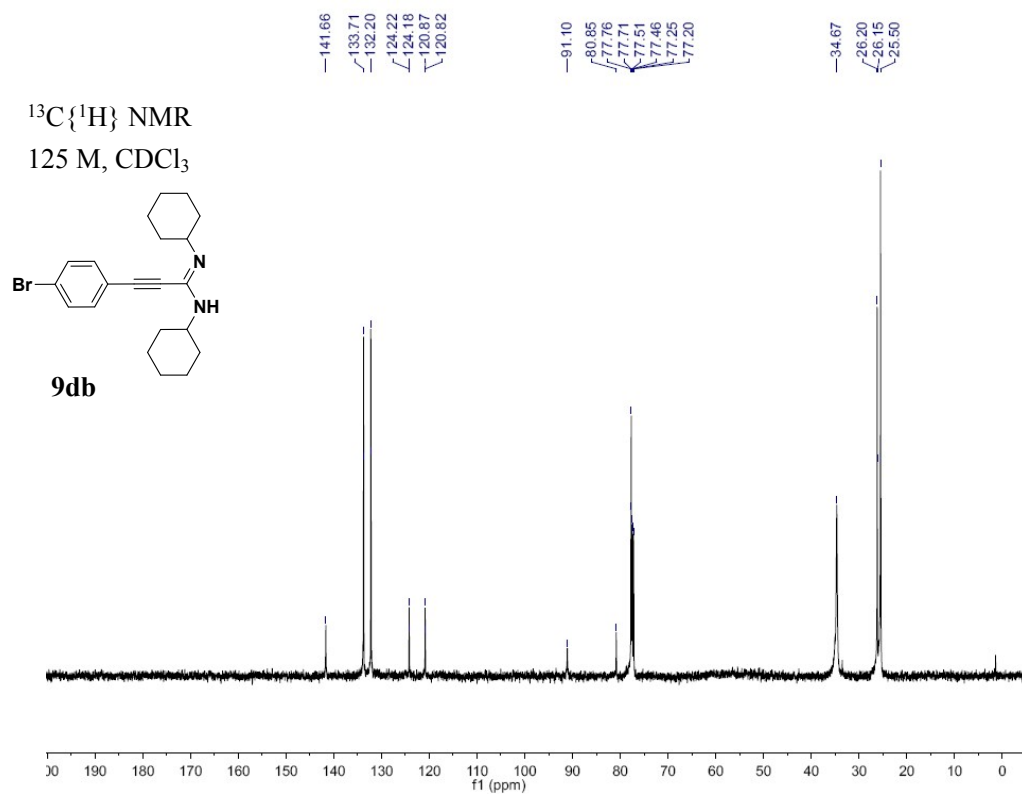

Figure S24. <sup>13</sup>C{<sup>1</sup>H} NMR spectrum of compound **9db**.

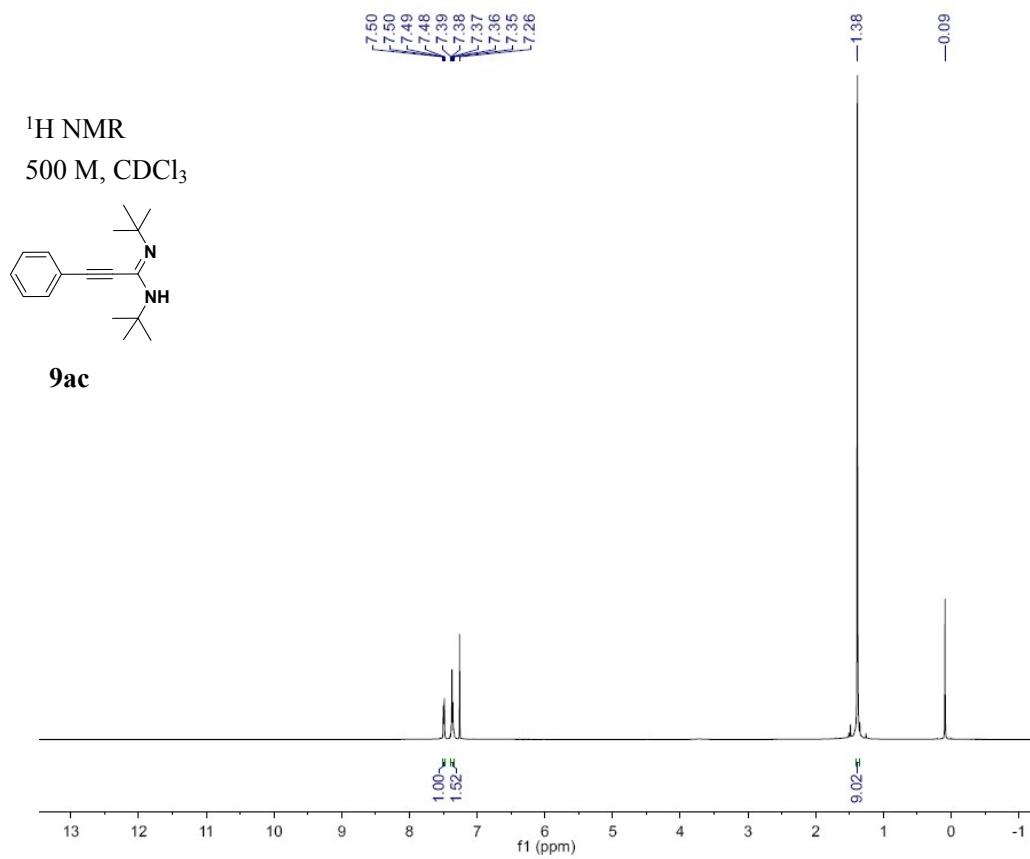

Figure S25. <sup>1</sup>H NMR spectrum of compound **9ac**.

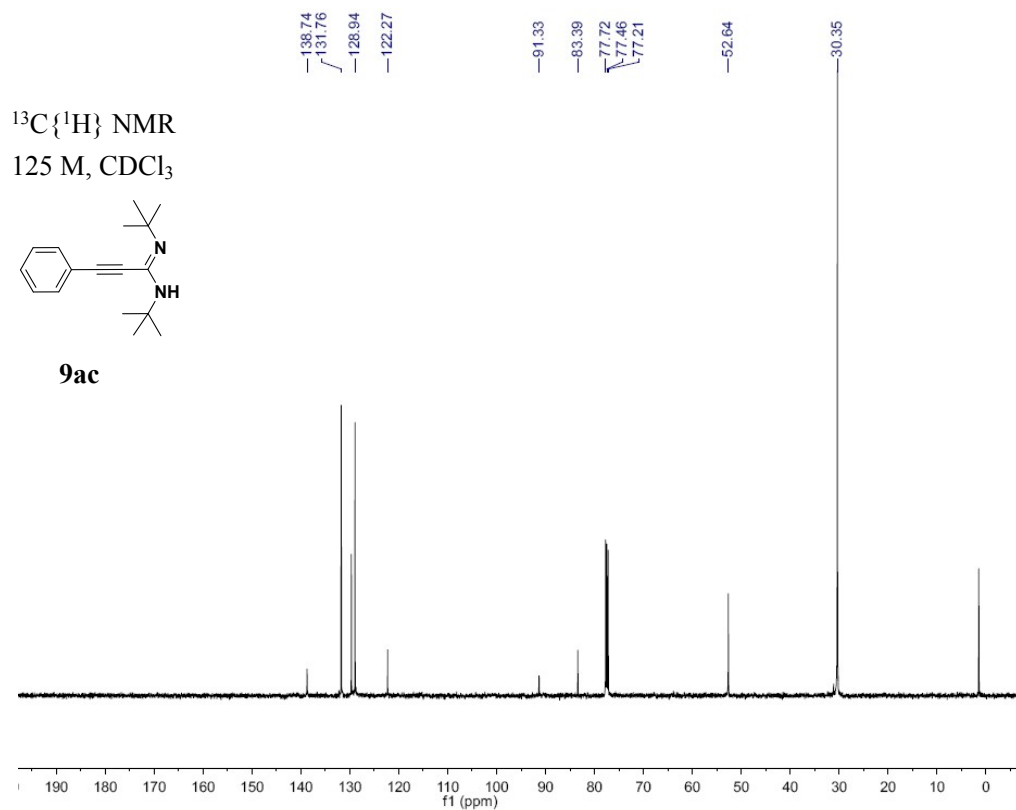

Figure S26. <sup>13</sup>C{<sup>1</sup>H} NMR spectrum of compound **9ac**.

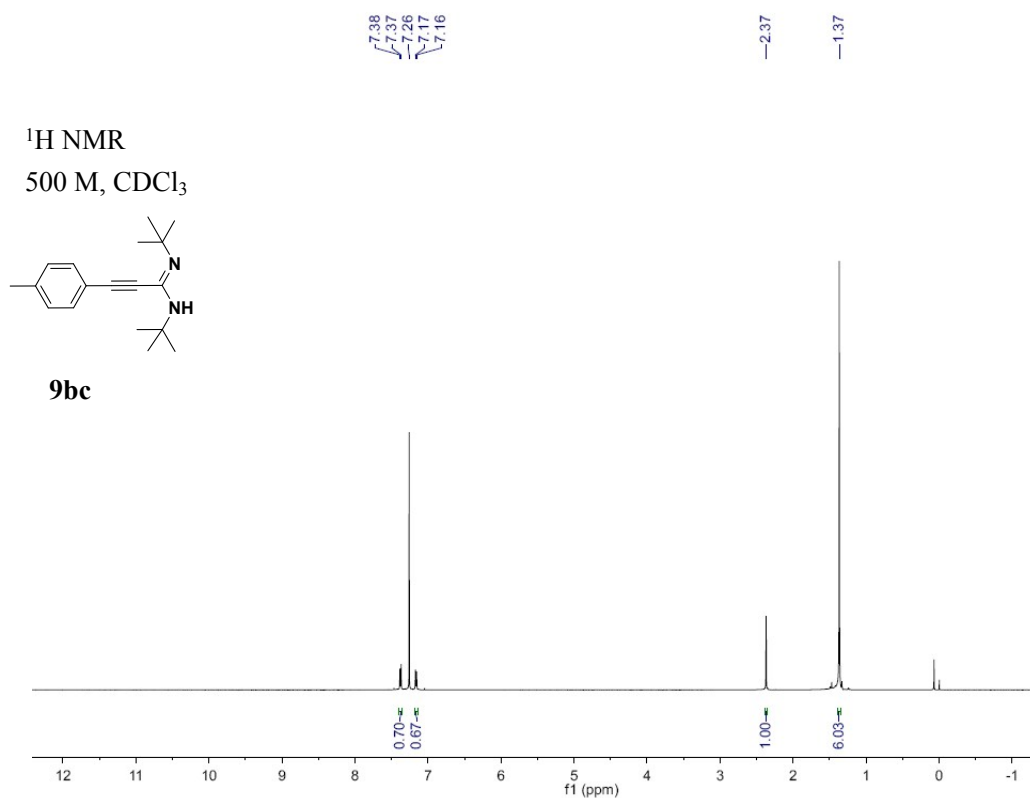

Figure S27. <sup>1</sup>H NMR spectrum of compound **9bc**.

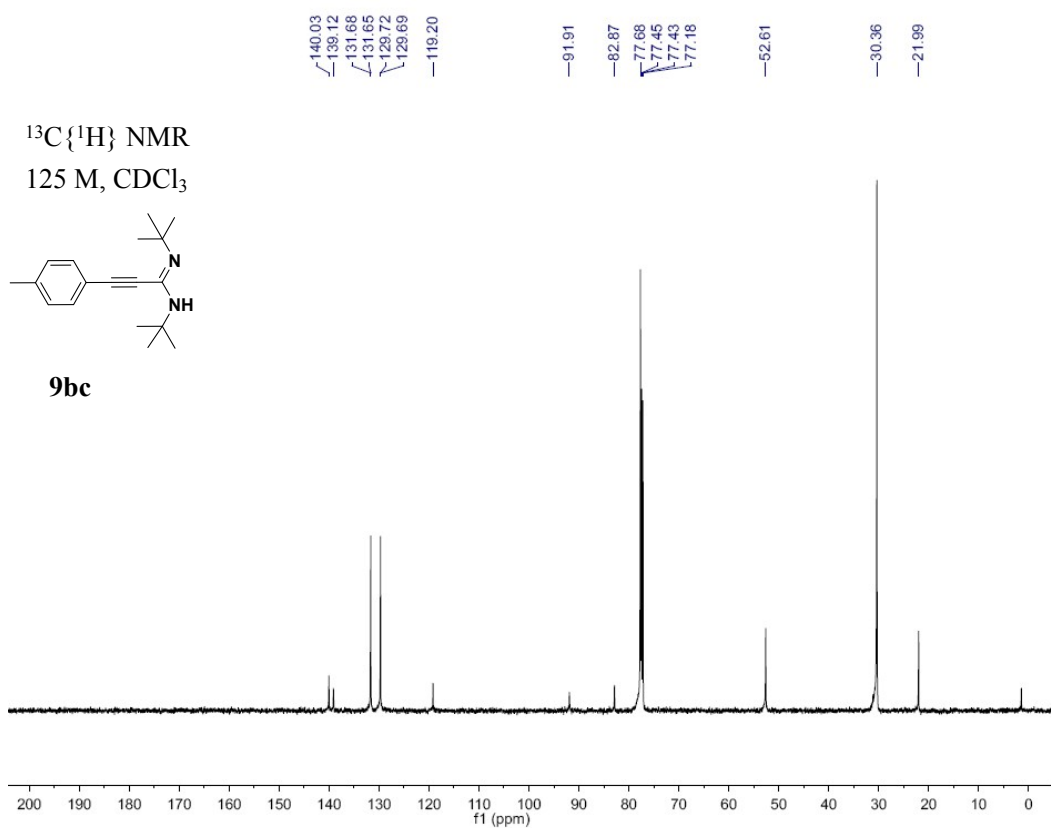

Figure S28. <sup>13</sup>C{<sup>1</sup>H} NMR spectrum of compound **9bc**.

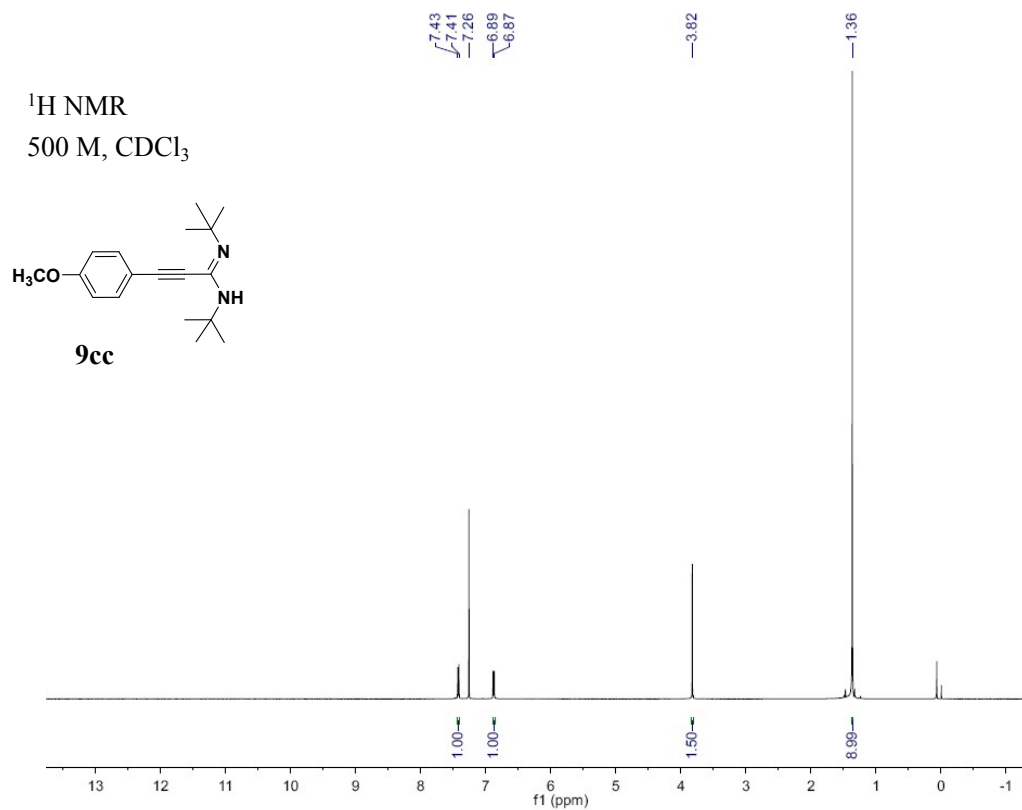

Figure S29. <sup>1</sup>H NMR spectrum of compound **9cc**.

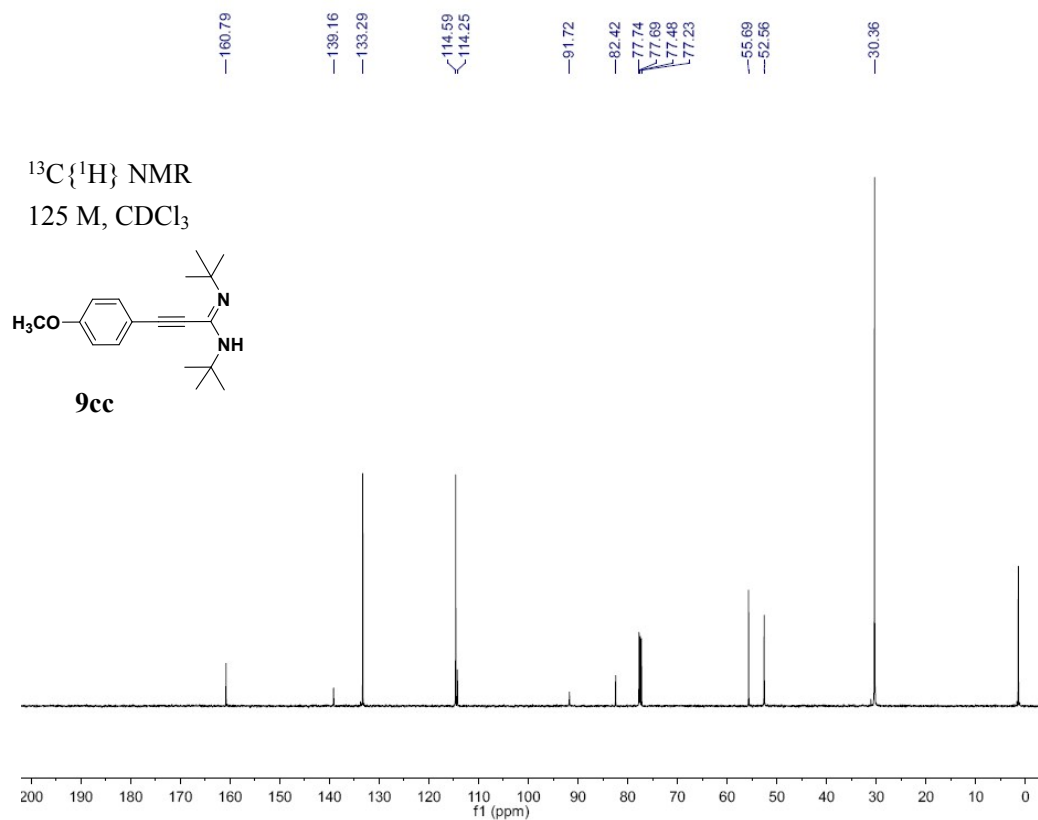

Figure S30. <sup>13</sup>C{<sup>1</sup>H} NMR spectrum of compound **9cc**.



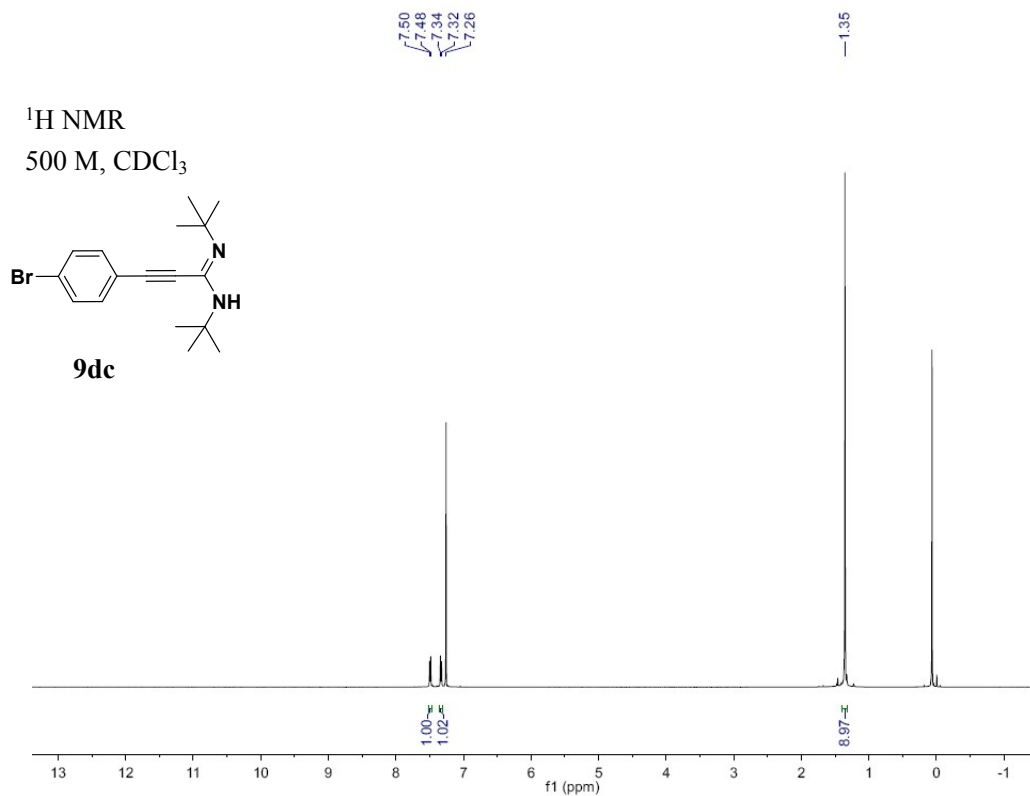

Figure S31. <sup>1</sup>H NMR spectrum of compound **9dc**.

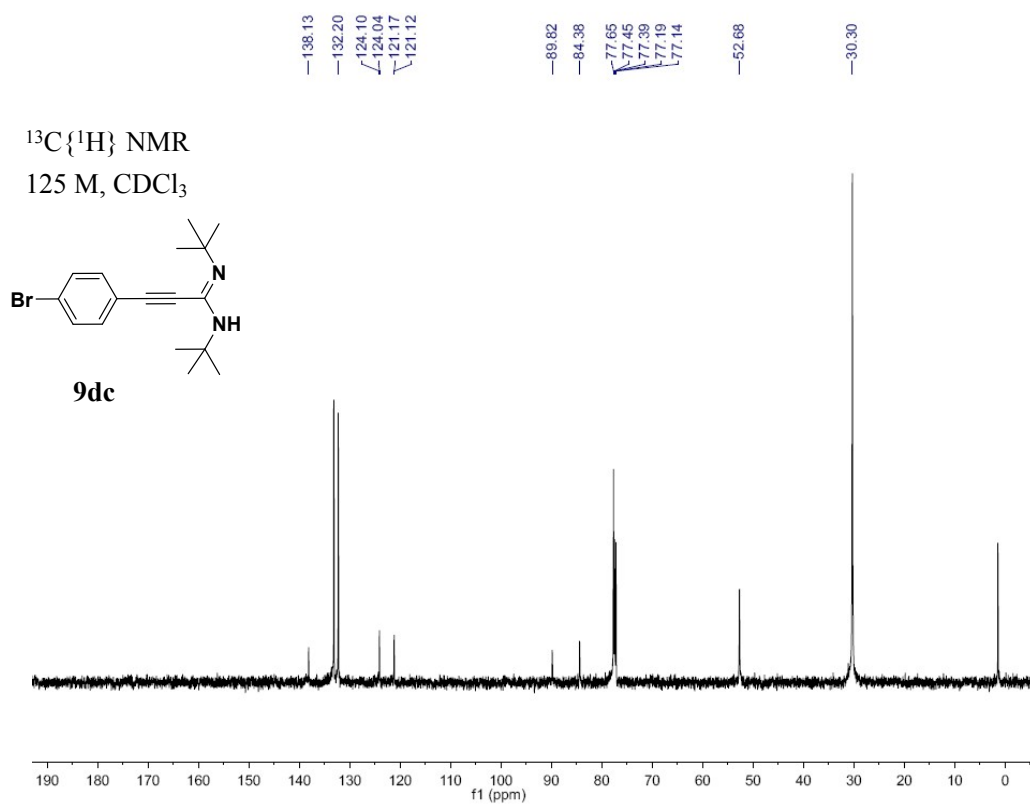

Figure S32. <sup>13</sup>C{<sup>1</sup>H} NMR spectrum of compound **9dc**.

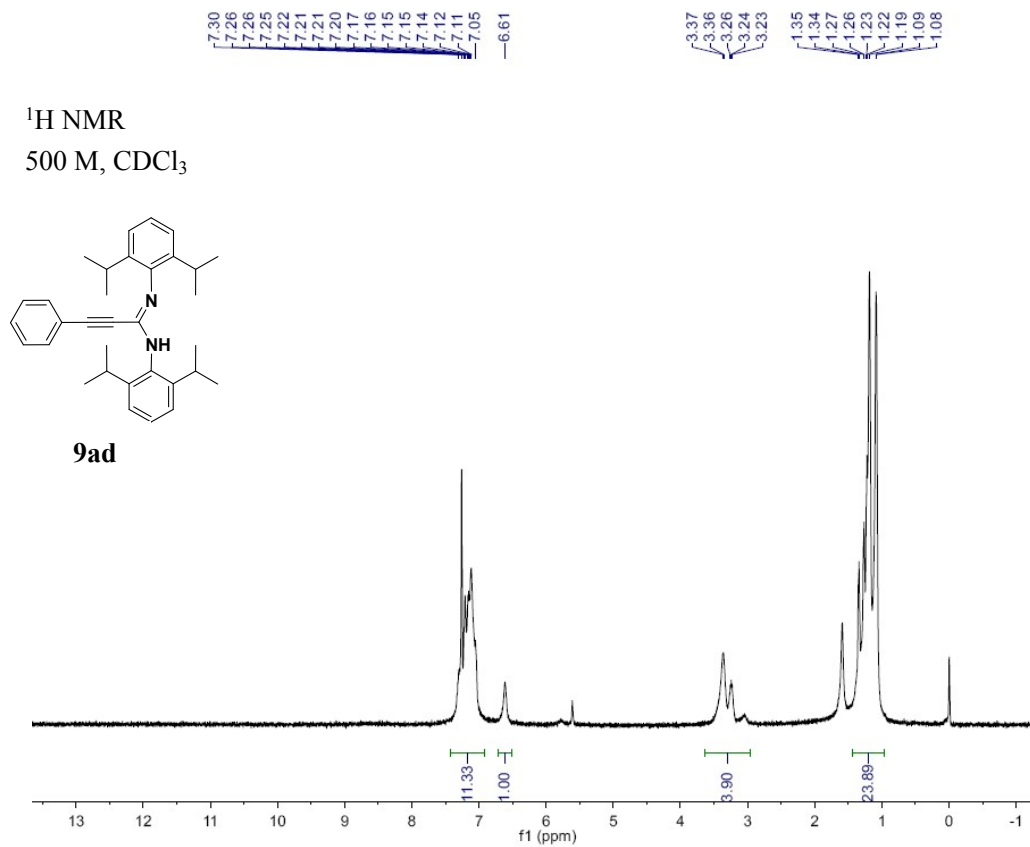

Figure S33. <sup>1</sup>H NMR spectrum of compound **9ad**.

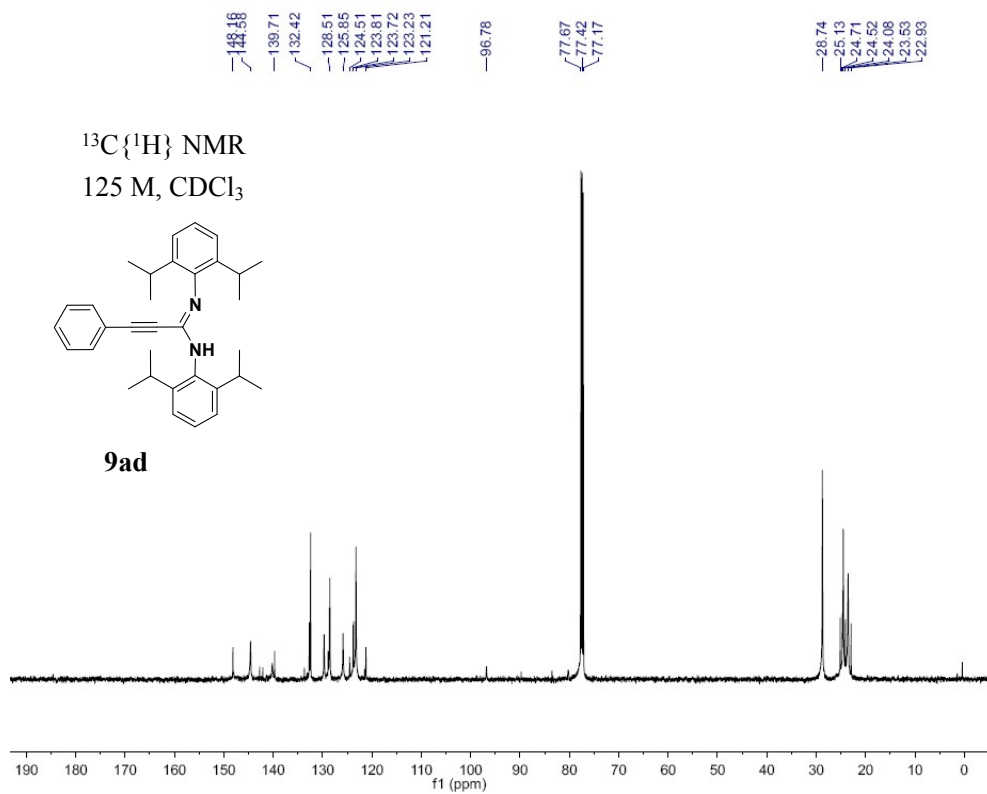

Figure S34. <sup>13</sup>C{<sup>1</sup>H} NMR spectrum of compound **9ad**.

**Molecular structures and selected bond distances and angles of the complexes 2–6, 10, 11, 12.**

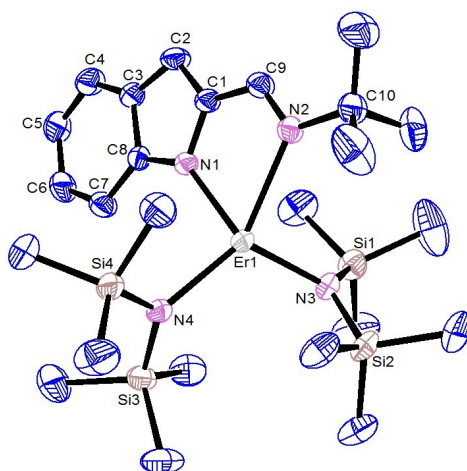

**Figure S35.** Structure of complex **2** (Ellipsoids at 30% probability level). Hydrogen atoms were omitted for clarity. Selected bond distances (Å) and angles (°): Er(1)–N(1) 2.271(2), Er(1)–N(2) 2.493(2), Er(1)–N(3) 2.197(2), Er(1)–N(4) 2.197(2), C(9)–N(2) 1.282(4), N(2)–C(9)–C(1) 123.0(3), N(1)–Er(1)–N(2) 72.94(8), N(3)–Er(1)–N(2) 100.73(9), N(4)–Er(1)–N(2) 143.46(8), N(3)–Er(1)–N(1) 120.63(9), N(4)–Er(1)–N(1) 97.86(9), N(4)–Er(1)–N(3) 113.81(9).

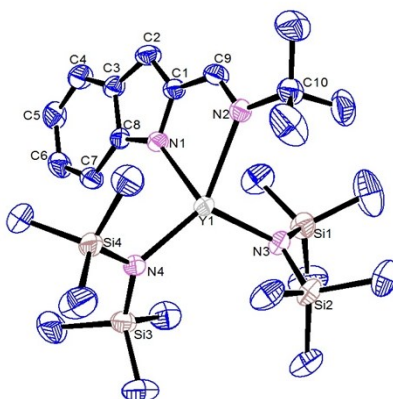

**Figure S36.** Structure of complex **3** (Ellipsoids at 30% probability level). Hydrogen atoms were omitted for clarity. Selected bond distances (Å) and angles (°): Y(1)–N(1) 2.293(2), Y(1)–N(2) 2.513(2), Y(1)–N(3) 2.208(2), Y(1)–N(4) 2.214(2), C(9)–N(2) 1.282(4), N(2)–C(9)–C(1) 123.1(3), N(1)–Y(1)–N(2) 72.04(8), N(3)–Y(1)–N(2) 100.61(9), N(4)–Y(1)–N(2) 142.73(9), N(3)–Y(1)–N(1) 121.87(9), N(4)–Y(1)–N(1) 98.12(9), N(4)–Y(1)–N(3) 114.41(10).

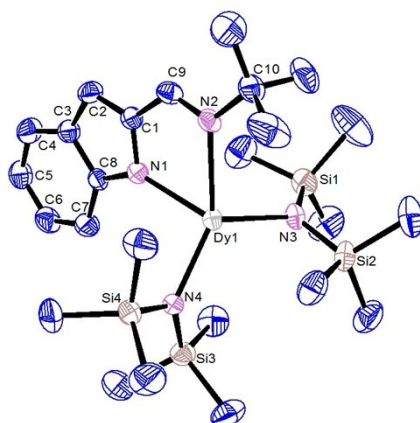

**Figure S37.** Structure of complex **4** (Ellipsoids at 30% probability level). Hydrogen atoms were omitted for clarity. Selected bond distances (Å) and angles (°): Dy(1)–N(1) 2.306(5), Dy(1)–N(2) 2.520(5), Dy(1)–N(3) 2.230(5), Dy(1)–N(4) 2.221(5), C(9)–N(2) 1.260(7), N(2)–C(9)–C(1) 122.9(6), N(1)–Dy(1)–N(2) 71.91(16), N(3)–Dy(1)–N(2) 100.01(18), N(4)–Dy(1)–N(2) 142.33(17), N(3)–Dy(1)–N(1) 122.65(18), N(4)–Dy(1)–N(1) 97.31(16), N(4)–Dy(1)–N(3) 115.45(19).

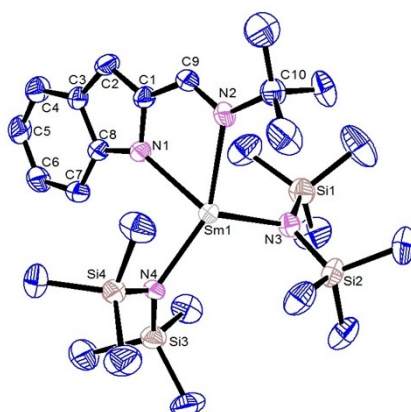

**Figure S38.** Structure of complex **5** (Ellipsoids at 30% probability level). Hydrogen atoms were omitted for clarity. Selected bond distances (Å) and angles (°): N(1)–Sm(1) 2.368(6), N(2)–Sm(1) 2.586(6), N(3)–Sm(1) 2.255(6), N(4)–Sm(1) 2.271(5), C(9)–N(2) 1.274(9), N(2)–C(9)–C(1) 123.7(7), N(1)–Sm(1)–N(2) 70.1(2), N(4)–Sm(1)–N(2) 140.7(2), N(3)–Sm(1)–N(2) 100.8(2), N(4)–Sm(1)–N(1) 97.3(2), N(3)–Sm(1)–N(1) 125.4(2), N(3)–Sm(1)–N(4) 115.9(2).

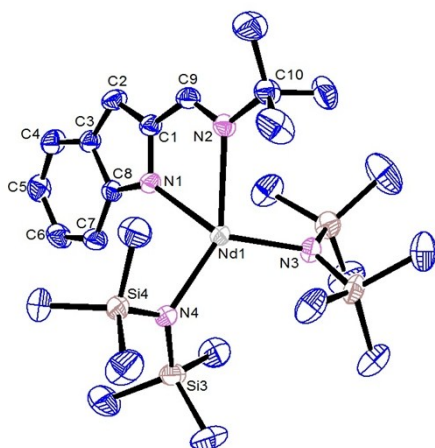

**Figure S39.** Structure of complex **6** (Ellipsoids at 30% probability level). Hydrogen atoms were omitted for clarity. Selected bond distances (Å) and angles (°): N(1)–Nd(1) 2.3967(19), N(2)–Nd(1) 2.611(2), N(3)–Nd(1) 2.292(2), N(4)–Nd(1) 2.2865(19), C(9)–N(2) 1.279(3), N(2)–C(9)–C(1) 123.4(2), N(1)–Nd(1)–N(2) 69.30(6), N(3)–Nd(1)–N(2) 101.34(7), N(4)–Nd(1)–N(2) 139.22(7), N(3)–Nd(1)–N(1) 125.97(7), N(4)–Nd(1)–N(1) 97.69(7), N(4)–Nd(1)–N(3) 116.49(7).

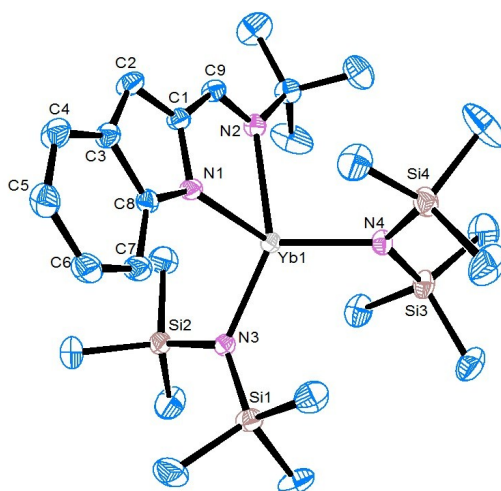

**Figure S40.** Structure of complex **10** (Ellipsoids at 30 % probability level). Hydrogen atoms were omitted for clarity. Selected bond distances (Å) and angles (°): N(1)–Yb(1) 2.258(2), N(2)–Yb(1) 2.471(2), N(3)–Yb(1) 2.174(2), N(4)–Yb(1) 2.169(2), C(9)–N(2) 1.282(3), N(2)–C(9)–C(1) 122.9(3), N(1)–Yb(1)–N(2) 73.15(7), N(3)–Yb(1)–N(2) 143.37(8), N(3)–Yb(1)–N(1) 97.87(8), N(4)–Yb(1)–N(2) 100.27(8), N(4)–Yb(1)–N(1) 122.81(8), N(4)–Yb(1)–N(3) 113.72(9).



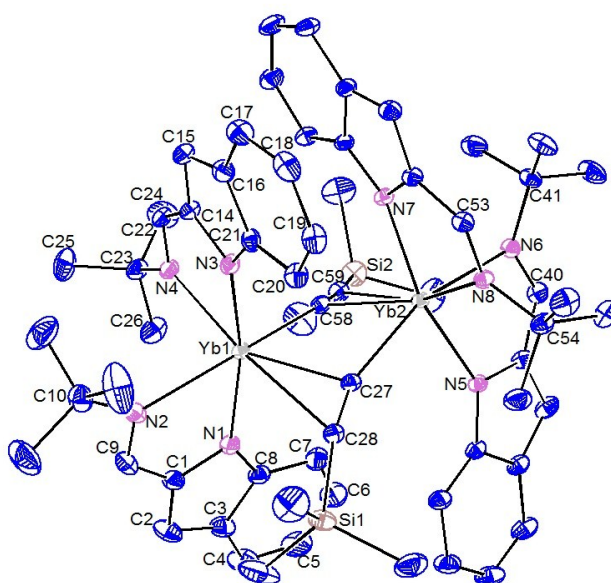

**Figure S42.** Structure of complex **12** (Ellipsoids at 15 % probability level). Hydrogen atoms were omitted for clarity. Selected bond distances (Å) and angles (°): N(1)–Yb(1) 2.285(3), N(2)–Yb(1) 2.504(4), N(3)–Yb(1) 2.292(3), N(4)–Yb(1) 2.404(3), N(5)–Yb(2) 2.300(3), N(6)–Yb(2) 2.493(3), N(7)–Yb(2) 2.287(3), N(8)–Yb(2) 2.422(3), C(9)–N(2) 1.285(6), C(22)–N(4) 1.288(5), C(40)–N(6) 1.292(5), C(53)–N(8) 1.281(5), C(27)–Yb(1) 2.483(4), C(28)–Yb(1) 2.954(4), C(27)–Yb(2) 2.479(4), C(27)–C(28) 1.216(5), C(58)–Yb(2) 2.473(4), C(59)–Yb(2) 3.035(4), C(58)–Yb(1) 2.488(4), C(58)–C(59) 1.205(5), N(2)–C(9)–C(1) 123.4(4), N(4)–C(22)–C(14) 123.3(4), N(6)–C(40)–C(32) 123.2(4), N(8)–C(53)–C(45) 122.4(4), N(1)–Yb(1)–N(3) 165.29(13), N(1)–Yb(1)–N(4) 107.22(12), N(3)–Yb(1)–N(4) 73.95(12), N(1)–Yb(1)–N(2) 72.28(13), N(3)–Yb(1)–N(2) 93.23(12), N(4)–Yb(1)–N(2) 88.08(12), N(1)–Yb(1)–C(27) 97.01(12), N(1)–Yb(1)–C(58) 91.63(13), N(3)–Yb(1)–C(27) 86.99(12), N(3)–Yb(1)–C(58) 103.02(12), N(5)–Yb(2)–N(6) 72.90(11), N(7)–Yb(2)–N(5) 164.76(11), N(5)–Yb(2)–N(8) 104.28(11), N(7)–Yb(2)–N(6) 91.97(11), N(8)–Yb(2)–N(6) 90.66(11), N(7)–Yb(2)–N(8) 73.41(11), N(5)–Yb(2)–C(27) 92.40(12), N(7)–Yb(2)–C(27) 102.29(11), N(5)–Yb(2)–C(58) 98.31(12), N(7)–Yb(2)–C(58) 88.24(12), C(28)–C(27)–Yb(2) 161.4(3), C(59)–C(58)–Yb(1) 156.1(4).

**Table S1.** Crystallographic data for **2–4**.

|                                                                                      | <b>2</b>                                                         | <b>3</b>                                                         | <b>4</b>                                                          |
|--------------------------------------------------------------------------------------|------------------------------------------------------------------|------------------------------------------------------------------|-------------------------------------------------------------------|
| formula                                                                              | C <sub>25</sub> H <sub>51</sub> ErN <sub>4</sub> Si <sub>4</sub> | C <sub>25</sub> H <sub>51</sub> N <sub>4</sub> Si <sub>4</sub> Y | C <sub>25</sub> H <sub>51</sub> N <sub>4</sub> Si <sub>4</sub> Dy |
| Fw                                                                                   | 687.31                                                           | 608.96                                                           | 682.55                                                            |
| <i>T</i> (K)                                                                         | 293(2)                                                           | 293(2)                                                           | 293(2)                                                            |
| $\lambda$ (Å)                                                                        | 0.71073                                                          | 0.71073                                                          | 0.71073                                                           |
| crystal system                                                                       | Monoclinic                                                       | Monoclinic                                                       | Monoclinic                                                        |
| space group                                                                          | <i>P</i> 2 <sub>1</sub> / <i>c</i>                               | <i>P</i> 2 <sub>1</sub> / <i>c</i>                               | <i>P</i> 2 <sub>1</sub> / <i>c</i>                                |
| <i>a</i> (Å)                                                                         | 18.1565(16)                                                      | 18.1922(16)                                                      | 18.233(3)                                                         |
| <i>b</i> (Å)                                                                         | 11.6742(10)                                                      | 11.6913(10)                                                      | 11.728(2)                                                         |
| <i>c</i> (Å)                                                                         | 17.3053(15)                                                      | 17.2934(15)                                                      | 17.281(3)                                                         |
| $\alpha$ (deg)                                                                       | 90                                                               | 90                                                               | 90                                                                |
| $\beta$ (deg)                                                                        | 109.1190(10)                                                     | 108.9890(10)                                                     | 108.947(2)                                                        |
| $\gamma$ (deg)                                                                       | 90                                                               | 90                                                               | 90                                                                |
| <i>V</i> (Å <sup>3</sup> )                                                           | 3465.7(5)                                                        | 3478.0(5)                                                        | 3495.2(11)                                                        |
| <i>Z</i>                                                                             | 4                                                                | 4                                                                | 4                                                                 |
| D <sub>calcd</sub> (mg/m <sup>3</sup> )                                              | 1.317                                                            | 1.163                                                            | 1.297                                                             |
| $\mu$ (mm <sup>-1</sup> )                                                            | 2.578                                                            | 1.833                                                            | 2.293                                                             |
| <i>F</i> (000)                                                                       | 1412                                                             | 1296                                                             | 1404                                                              |
| $\theta$ range (deg)                                                                 | 2.11–27.68                                                       | 2.11–27.58                                                       | 2.10–27.66                                                        |
| reflections collected                                                                | 29320/8062                                                       | 29572/7994                                                       | 28487/8052                                                        |
| / unique                                                                             |                                                                  |                                                                  |                                                                   |
| <i>R</i> (int)                                                                       | 0.0326                                                           | 0.0610                                                           | 0.0660                                                            |
| goodness-of-fit on <i>F</i> <sup>2</sup>                                             | 1.031                                                            | 1.002                                                            | 1.005                                                             |
| <i>R</i> <sub>1</sub> , <i>wR</i> <sub>2</sub> [ <i>I</i> > 2 $\sigma$ ( <i>I</i> )] | 0.0285, 0.0700                                                   | 0.0460, 0.0909                                                   | 0.0530, 0.1324                                                    |
| <i>R</i> <sub>1</sub> , <i>wR</i> <sub>2</sub> (all data)                            | 0.0356, 0.0744                                                   | 0.1020, 0.1080                                                   | 0.0875, 0.1586                                                    |
| Largest diff. peak<br>and hole (e Å <sup>-3</sup> )                                  | 0.755 and -1.232                                                 | 0.402 and -0.405                                                 | 3.194 and -2.020                                                  |



**Table S2.** Crystallographic data for **5**, **6**, **10**.

|                                                                                      | <b>5</b>                                                          | <b>6</b>                                                          | <b>10</b>                                                         |
|--------------------------------------------------------------------------------------|-------------------------------------------------------------------|-------------------------------------------------------------------|-------------------------------------------------------------------|
| formula                                                                              | C <sub>25</sub> H <sub>51</sub> N <sub>4</sub> Si <sub>4</sub> Sm | C <sub>25</sub> H <sub>51</sub> N <sub>4</sub> Si <sub>4</sub> Nd | C <sub>25</sub> H <sub>51</sub> N <sub>4</sub> Si <sub>4</sub> Yb |
| Fw                                                                                   | 670.40                                                            | 664.29                                                            | 693.09                                                            |
| <i>T</i> (K)                                                                         | 293(2)                                                            | 293(2)                                                            | 293(2)                                                            |
| $\lambda$ (Å)                                                                        | 0.71073                                                           | 0.71073                                                           | 0.71073                                                           |
| crystal system                                                                       | Monoclinic                                                        | Monoclinic                                                        | Monoclinic                                                        |
| space group                                                                          | <i>P</i> 2 <sub>1</sub> / <i>c</i>                                | <i>P</i> 2 <sub>1</sub> / <i>c</i>                                | <i>P</i> 2 <sub>1</sub> / <i>c</i>                                |
| <i>a</i> (Å)                                                                         | 18.356(4)                                                         | 18.3322(11)                                                       | 18.1425(13)                                                       |
| <i>b</i> (Å)                                                                         | 11.757(3)                                                         | 11.7260(7)                                                        | 11.6936(8)                                                        |
| <i>c</i> (Å)                                                                         | 17.248(4)                                                         | 17.2138(10)                                                       | 17.2342(12)                                                       |
| $\alpha$ (deg)                                                                       | 90                                                                | 90                                                                | 90                                                                |
| $\beta$ (deg)                                                                        | 108.672(3)                                                        | 108.5360(10)                                                      | 109.0750(10)                                                      |
| $\gamma$ (deg)                                                                       | 90                                                                | 90                                                                | 90                                                                |
| <i>V</i> (Å <sup>3</sup> )                                                           | 3526.6(14)                                                        | 3508.4(4)                                                         | 3455.5(4)                                                         |
| <i>Z</i>                                                                             | 4                                                                 | 4                                                                 | 4                                                                 |
| D <sub>calcd</sub> (mg/m <sup>3</sup> )                                              | 1.263                                                             | 1.258                                                             | 1.332                                                             |
| $\mu$ (mm <sup>-1</sup> )                                                            | 1.819                                                             | 1.635                                                             | 2.864                                                             |
| <i>F</i> (000)                                                                       | 1388                                                              | 1380                                                              | 1420                                                              |
| $\theta$ range (deg)                                                                 | 2.09–27.66                                                        | 2.10–27.63                                                        | 2.11–27.62                                                        |
| reflections collected                                                                | 28465/8093                                                        | 29901/8097                                                        | 29236/7948                                                        |
| / unique                                                                             |                                                                   |                                                                   |                                                                   |
| <i>R</i> (int)                                                                       | 0.0899                                                            | 0.0264                                                            | 0.0298                                                            |
| goodness-of-fit on <i>F</i> <sup>2</sup>                                             | 1.028                                                             | 1.016                                                             | 1.036                                                             |
| <i>R</i> <sub>1</sub> , <i>wR</i> <sub>2</sub> [ <i>I</i> > 2 $\sigma$ ( <i>I</i> )] | 0.0573, 0.1298                                                    | 0.0257, 0.0606                                                    | 0.0251, 0.0598                                                    |
| <i>R</i> <sub>1</sub> , <i>wR</i> <sub>2</sub> (all data)                            | 0.1386, 0.1671                                                    | 0.0369, 0.0657                                                    | 0.0335, 0.0641                                                    |
| Largest diff. peak<br>and hole (e Å <sup>-3</sup> )                                  | 2.166 and -1.584                                                  | 0.519 and -0.644                                                  | 0.407 and -1.088                                                  |

**Table S3.** Crystallographic data for **11**, **12**.

|                                                                                      | <b>11</b>                                                     | <b>12</b>                                                                      |
|--------------------------------------------------------------------------------------|---------------------------------------------------------------|--------------------------------------------------------------------------------|
| formula                                                                              | C <sub>68</sub> H <sub>70</sub> N <sub>8</sub> Y <sub>2</sub> | C <sub>62</sub> H <sub>78</sub> N <sub>8</sub> Si <sub>2</sub> Yb <sub>2</sub> |
| Fw                                                                                   | 1177.14                                                       | 1337.58                                                                        |
| T(K)                                                                                 | 293(2)                                                        | 293(2)                                                                         |
| $\lambda$ (Å)                                                                        | 0.71073                                                       | 0.71073                                                                        |
| crystal system                                                                       | Monoclinic                                                    | Triclinic                                                                      |
| space group                                                                          | <i>P</i> 2 <sub>1</sub> / <i>c</i>                            | <i>P</i> $\bar{1}$                                                             |
| <i>a</i> (Å)                                                                         | 12.995(3)                                                     | 12.6269(9)                                                                     |
| <i>b</i> (Å)                                                                         | 20.995(5)                                                     | 12.9123(10)                                                                    |
| <i>c</i> (Å)                                                                         | 23.338(6)                                                     | 22.4030(17)                                                                    |
| $\alpha$ (deg)                                                                       | 90                                                            | 77.3030(10)                                                                    |
| $\beta$ (deg)                                                                        | 106.16                                                        | 80.6500(10)                                                                    |
| $\gamma$ (deg)                                                                       | 90                                                            | 61.7530(10)                                                                    |
| <i>V</i> (Å <sup>3</sup> )                                                           | 6116(3)                                                       | 3131.7(4)                                                                      |
| <i>Z</i>                                                                             | 4                                                             | 2                                                                              |
| D <sub>calcd</sub> (mg/m <sup>3</sup> )                                              | 1.278                                                         | 1.418                                                                          |
| $\mu$ (mm <sup>-1</sup> )                                                            | 1.935                                                         | 3.049                                                                          |
| <i>F</i> (000)                                                                       | 2448                                                          | 1348                                                                           |
| $\theta$ range (deg)                                                                 | 1.63–25.03                                                    | 1.82–25.41                                                                     |
| reflections collected                                                                | 43976/10794                                                   | 31940/11514                                                                    |
| / unique                                                                             |                                                               |                                                                                |
| <i>R</i> (int)                                                                       | 0.1758                                                        | 0.0267                                                                         |
| goodness-of-fit on <i>F</i> <sup>2</sup>                                             | 0.993                                                         | 1.036                                                                          |
| <i>R</i> <sub>1</sub> , <i>wR</i> <sub>2</sub> [ <i>I</i> > 2 $\sigma$ ( <i>I</i> )] | 0.0725, 0.1799                                                | 0.0282, 0.0608                                                                 |
| <i>R</i> <sub>1</sub> , <i>wR</i> <sub>2</sub> (all data)                            | 0.1724, 0.2264                                                | 0.0388, 0.0654                                                                 |
| Largest diff. peak<br>and hole (e Å <sup>-3</sup> )                                  | 0.847 and -0.767                                              | 1.323 and -0.811                                                               |
